# Supplementary material for: Direct halogenative dearomatization of 2-naphthols by NXS (X = Cl, Br) in water
Source: Royal Society of Chemistry journal article supplement (doi:10.1039/c6gc01673a), 2016-01-01

## Supplementary Data

### Directly halogenative dearomatization of 2-naphthols by NXS (X = Cl, Br) in water

Zhenbei Zhang,<sup>a,b</sup> Qiangsheng Sun,<sup>a</sup> Daqian Xu,<sup>a</sup> Chungu Xia<sup>a</sup> and Wei Sun<sup>\*a</sup>

<sup>a</sup> State Key Laboratory for Oxo Synthesis and Selective Oxidation, and Suzhou Research center of LICP, Lanzhou Institute of Chemical Physics (LICP), Chinese Academy of Sciences, Lanzhou 730000, China

<sup>b</sup> University of Chinese Academy of Sciences, Beijing 100049, China

\*Corresponding author Phone: +86-931-496-8278; E-mail: wsun@licp.cas.cn

#### Table of Content

|                                  |    |
|----------------------------------|----|
| NMR spectra of the products..... | S2 |
|----------------------------------|----|

# <sup>1</sup>H and <sup>13</sup>C NMR spectra of the products

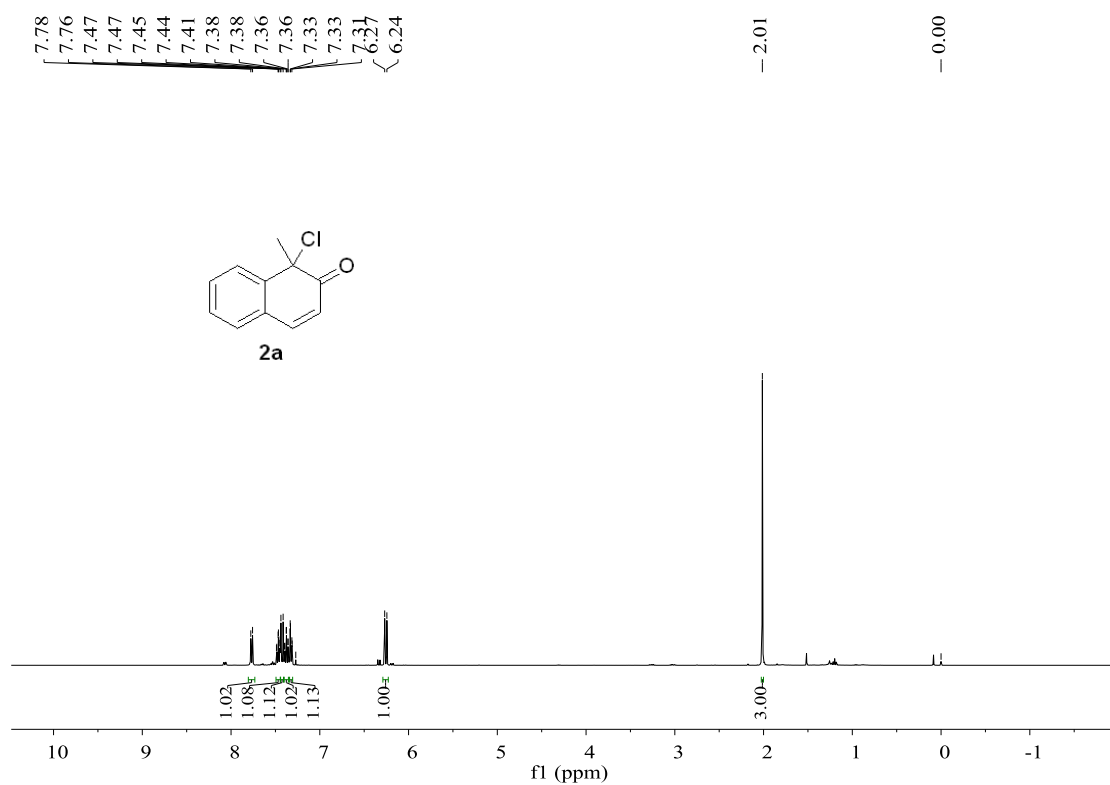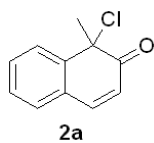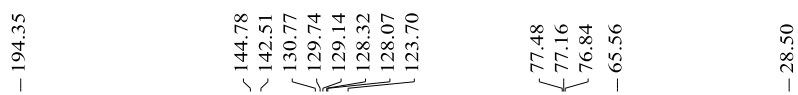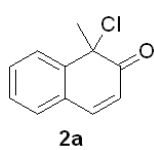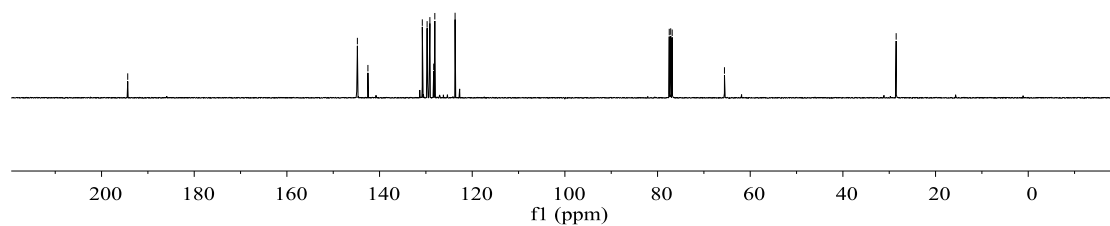

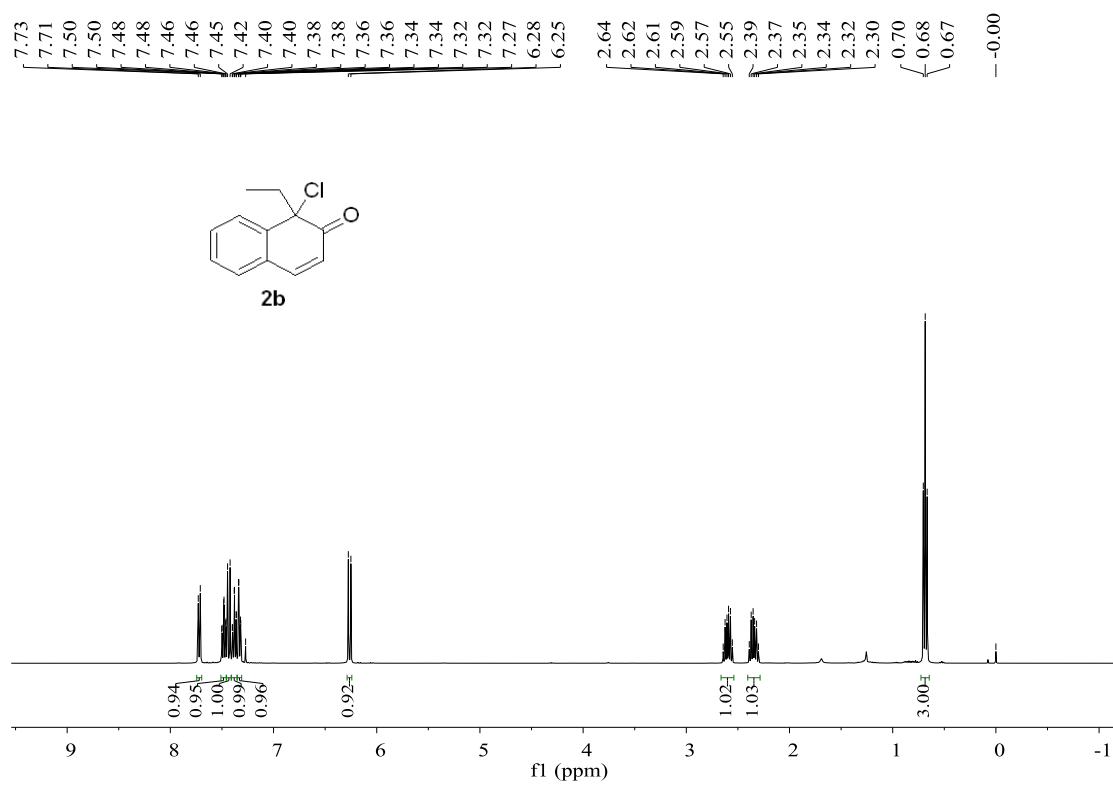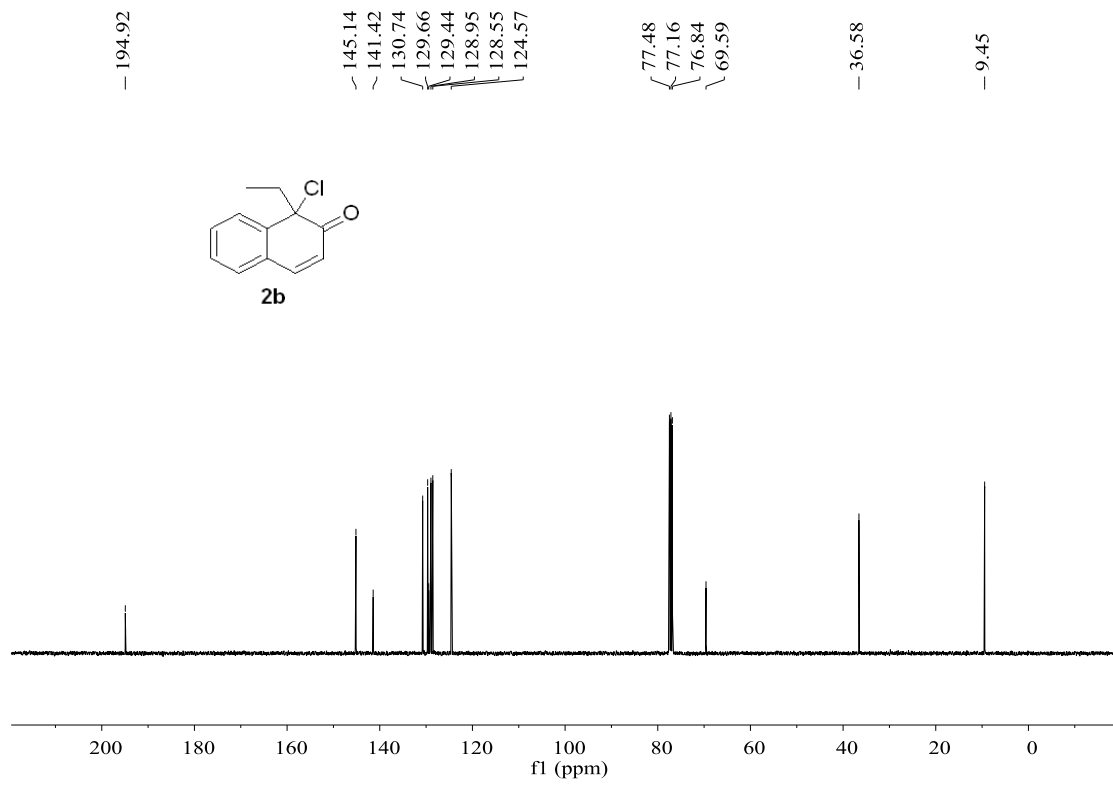

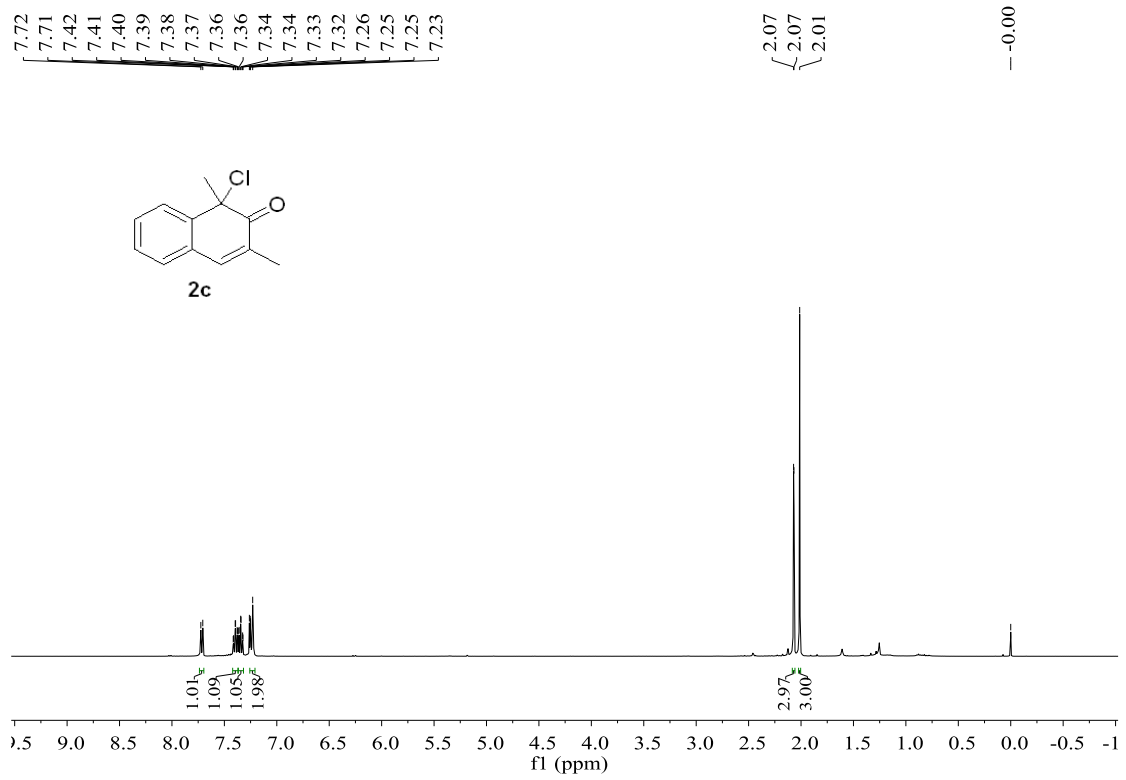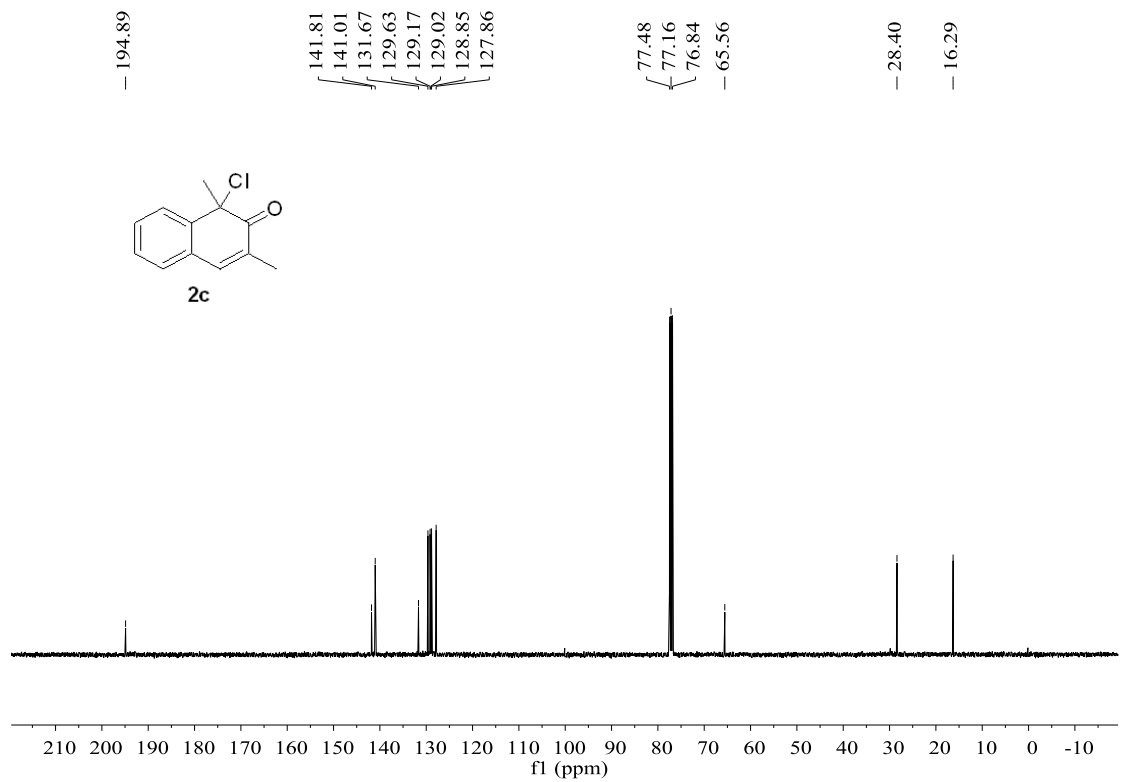

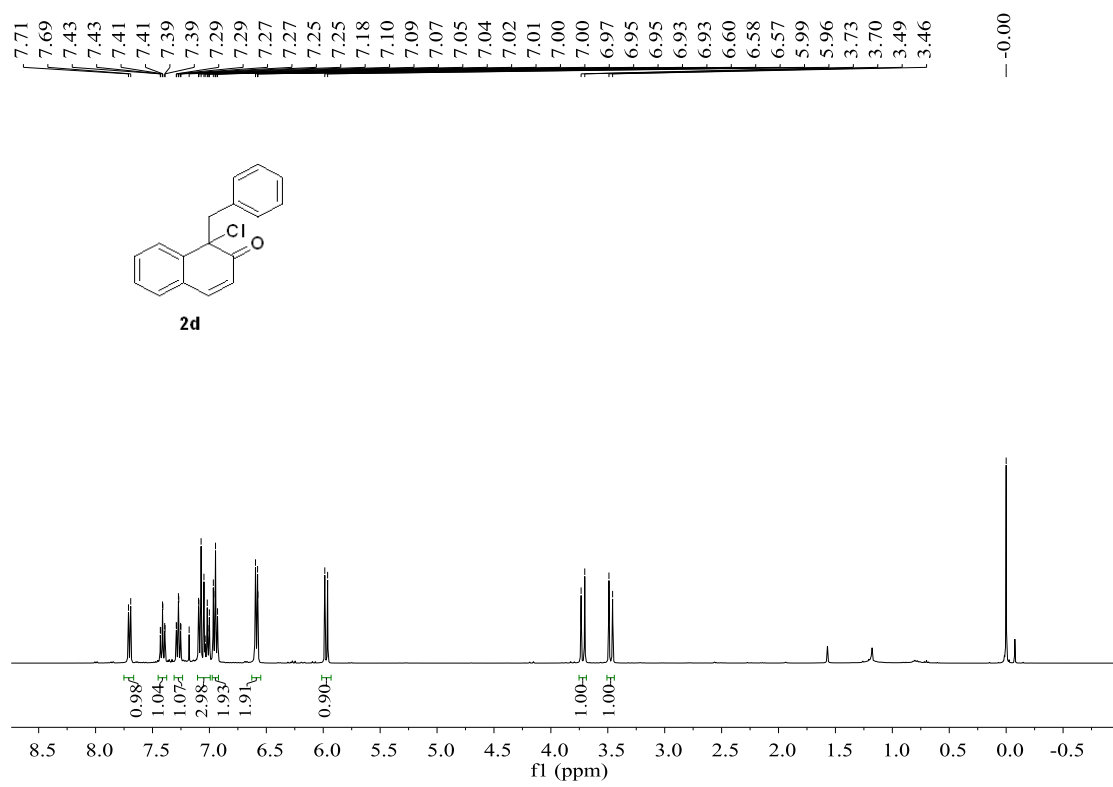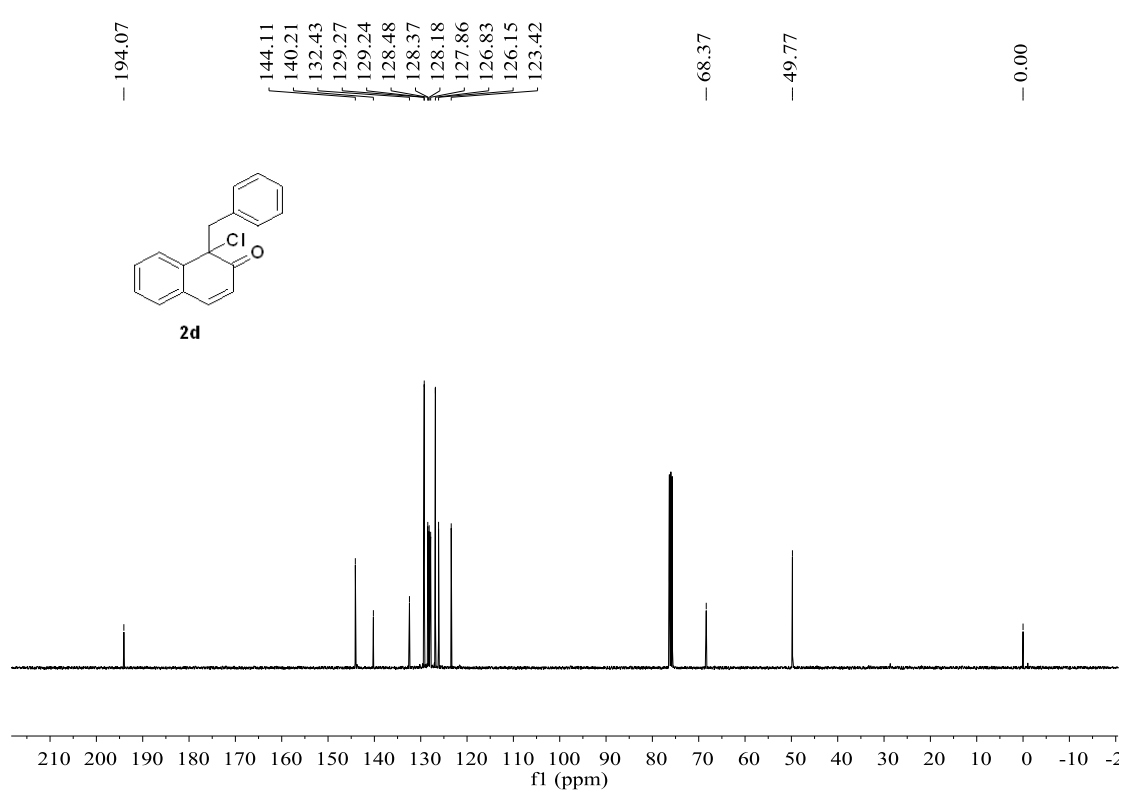

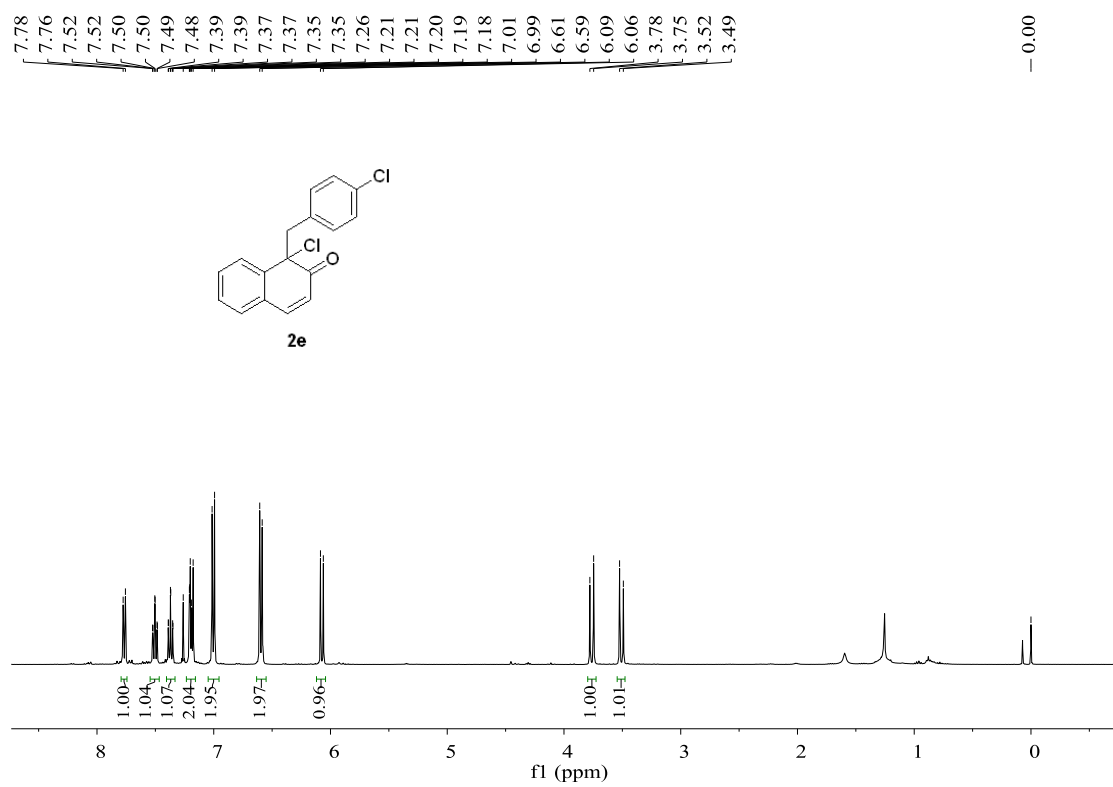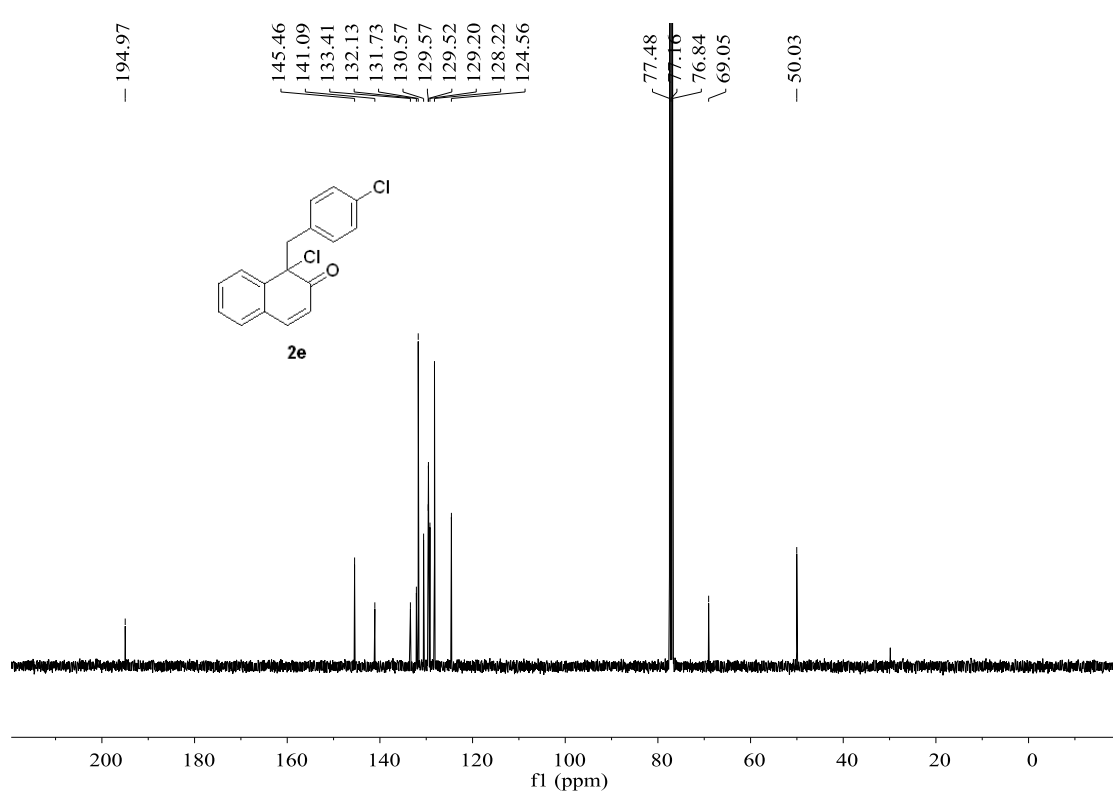

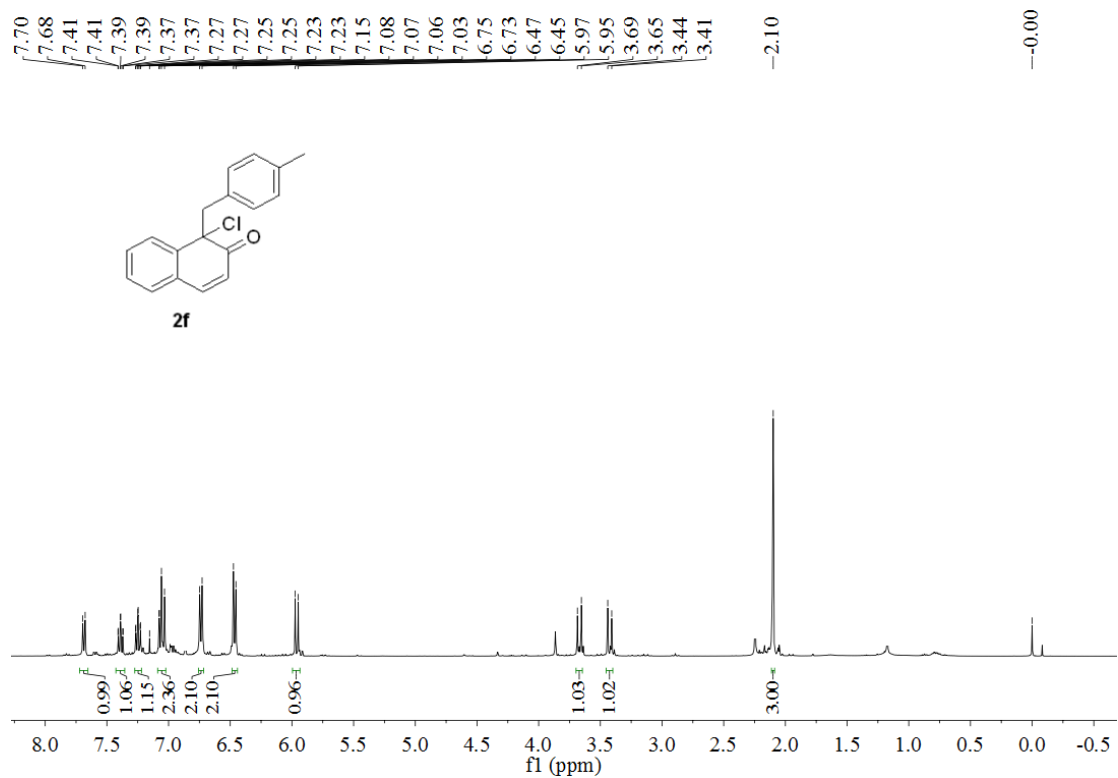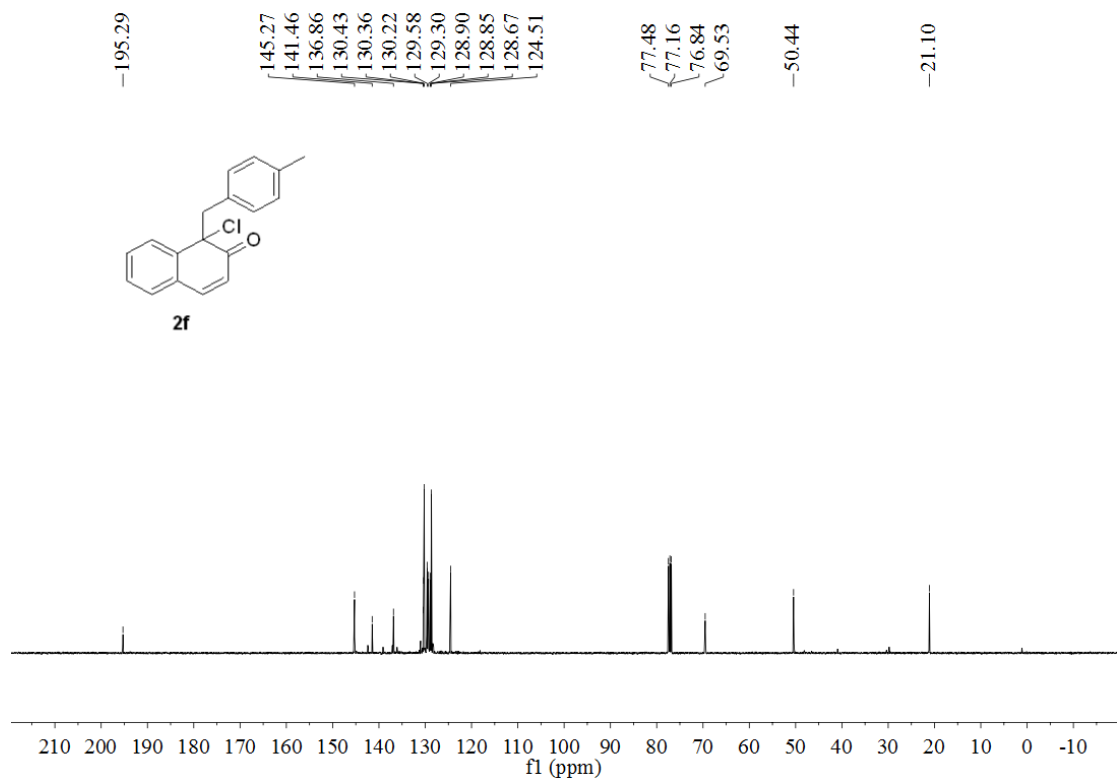

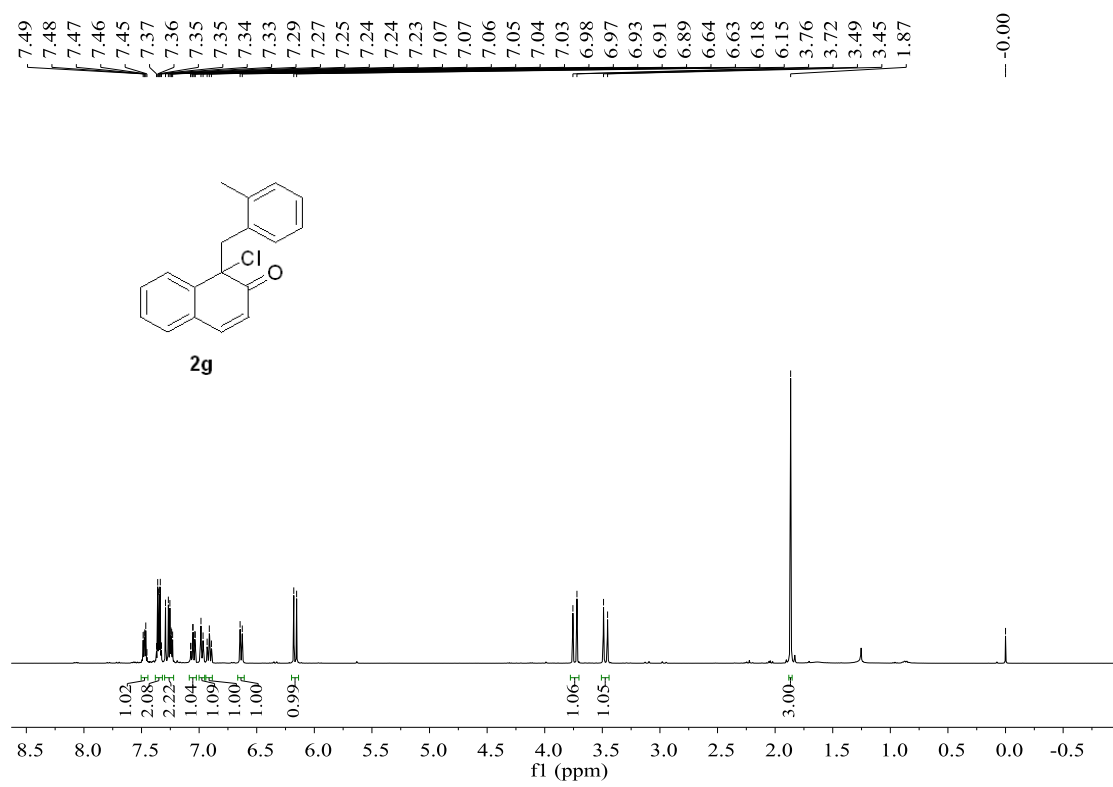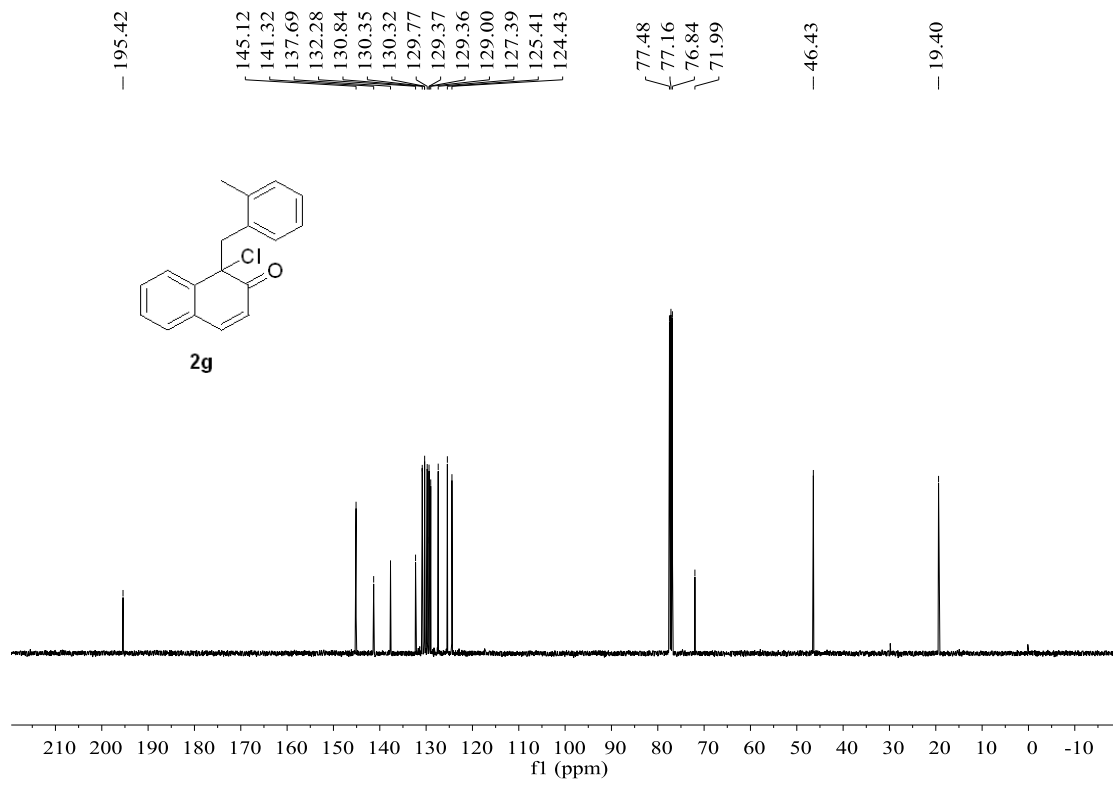



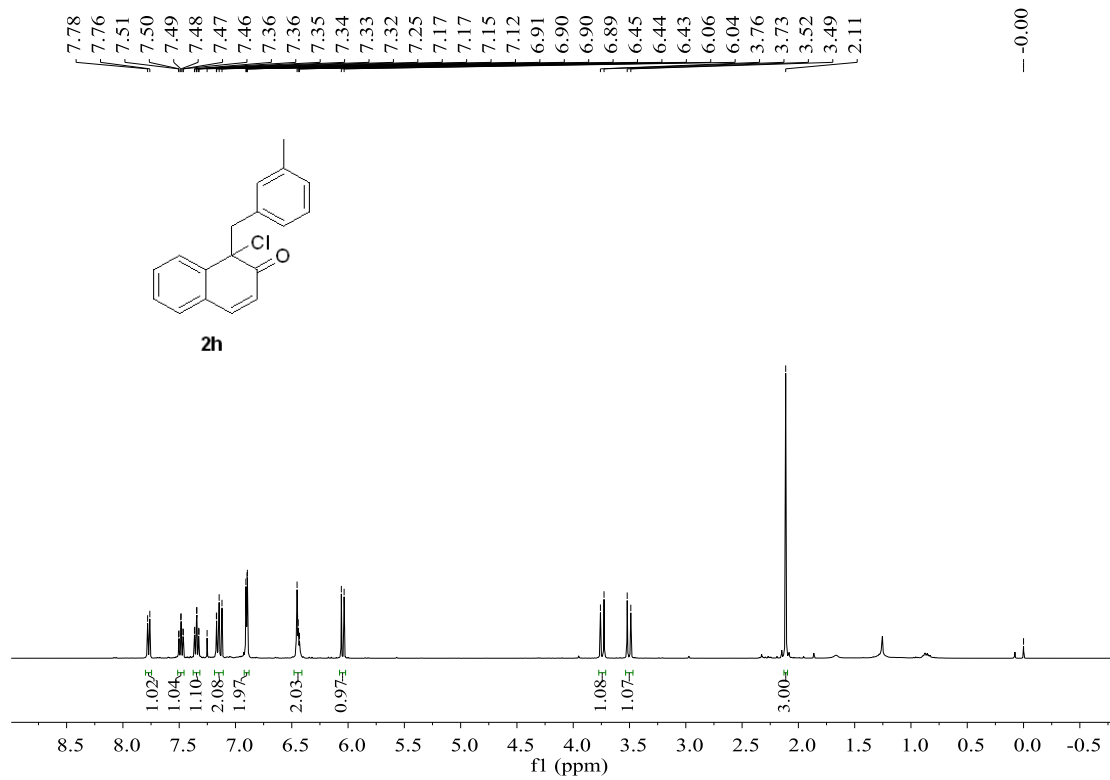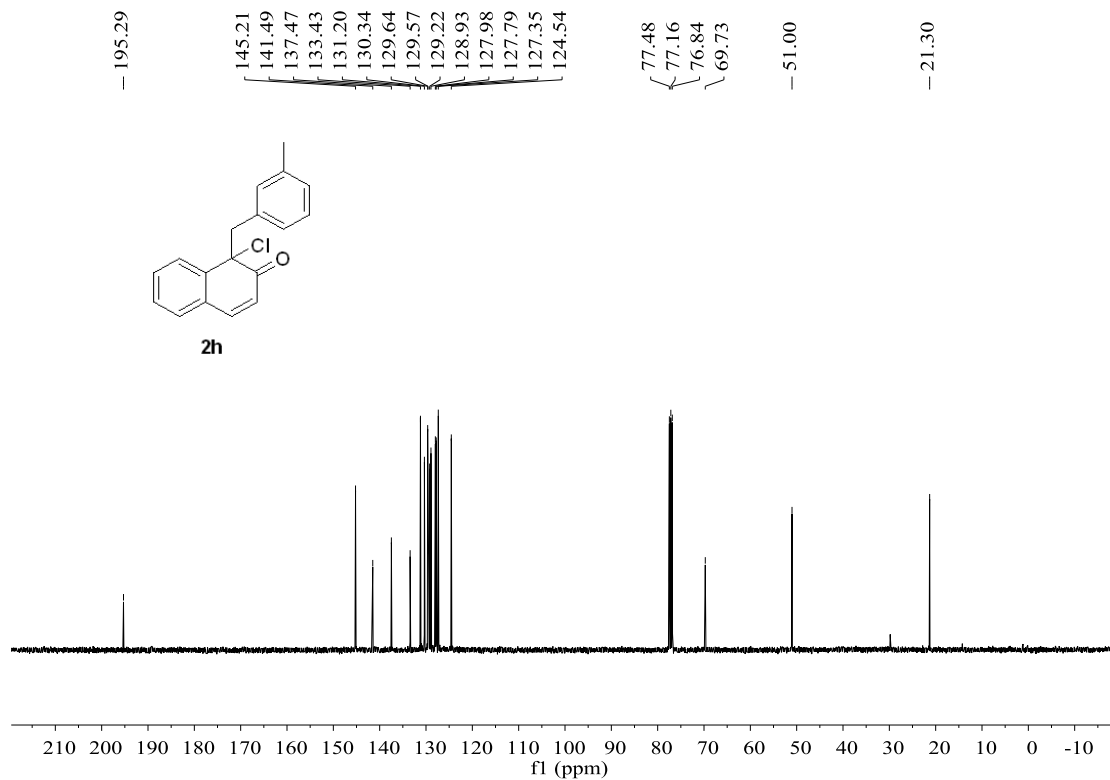

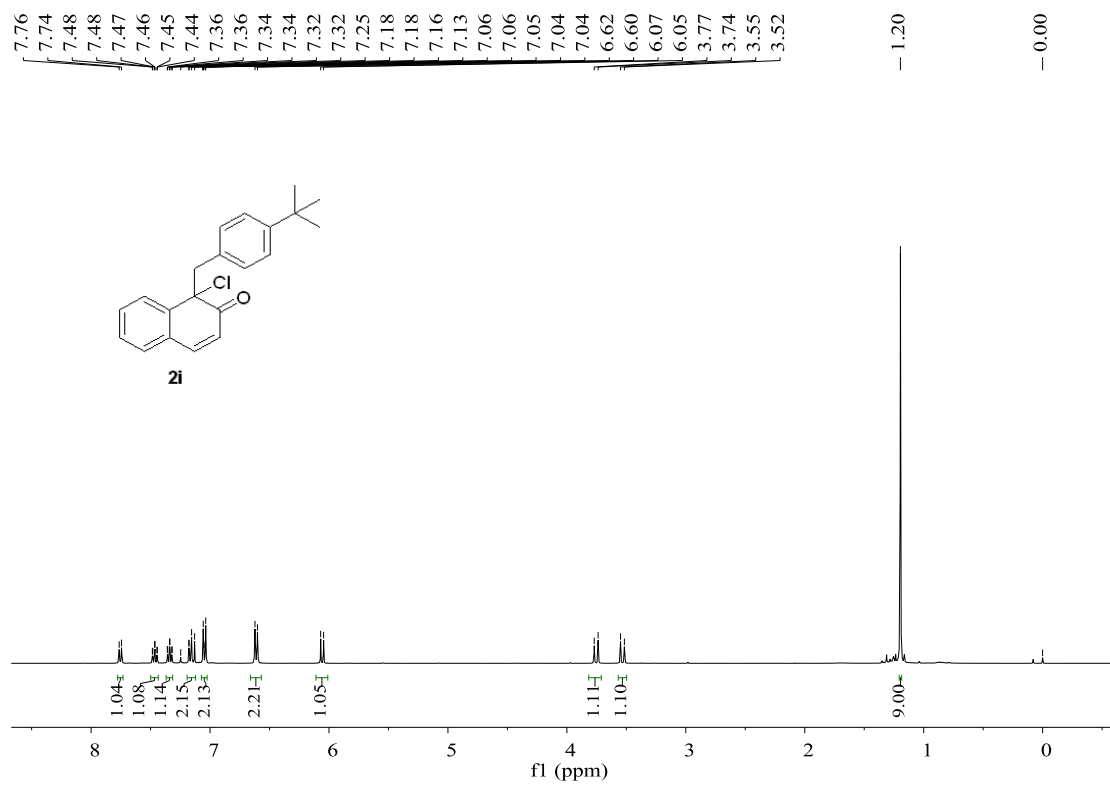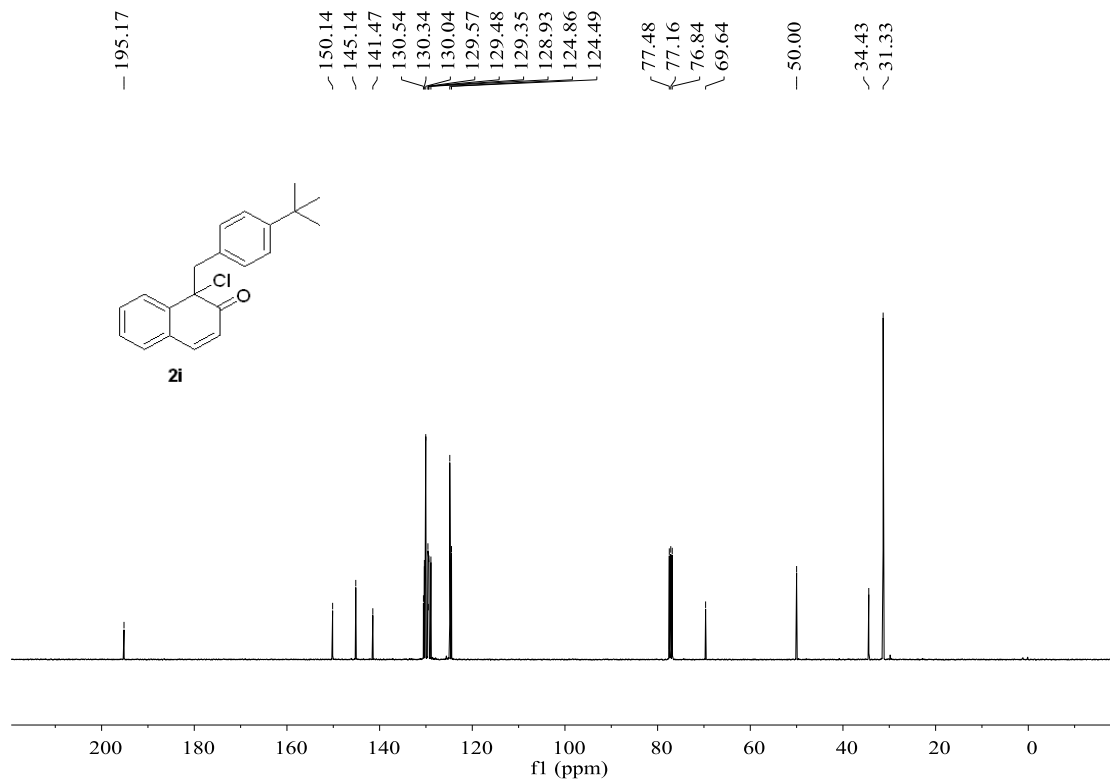

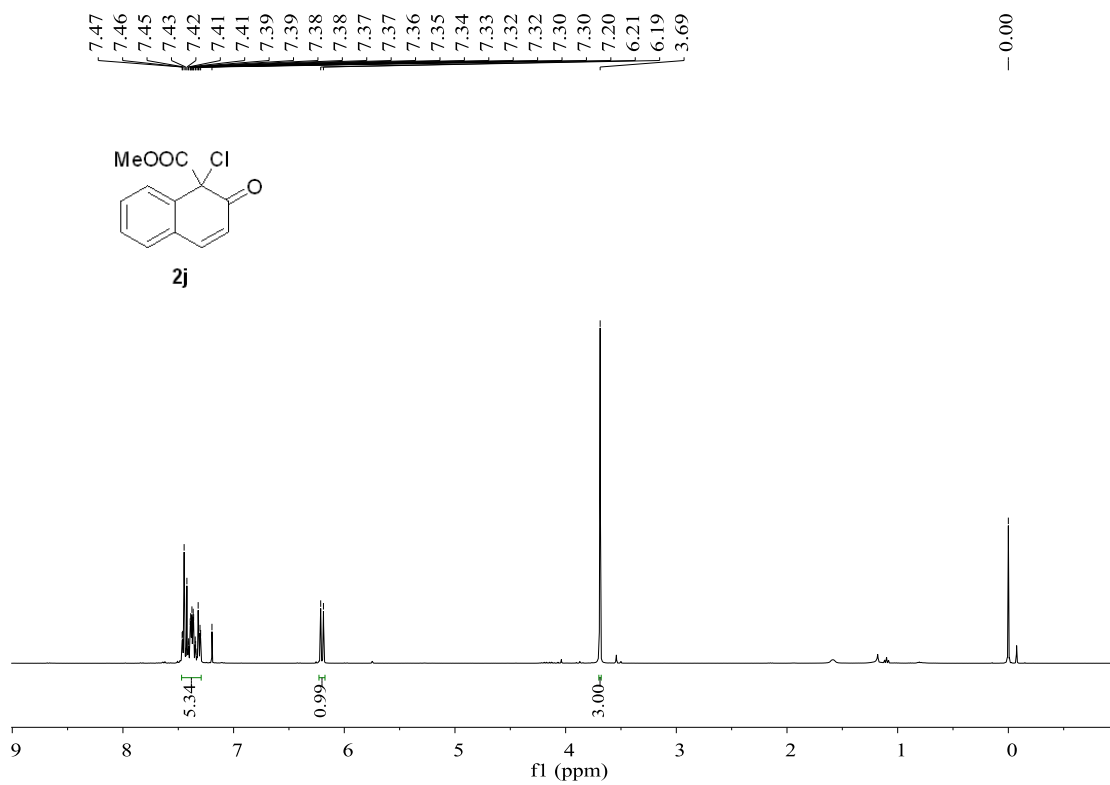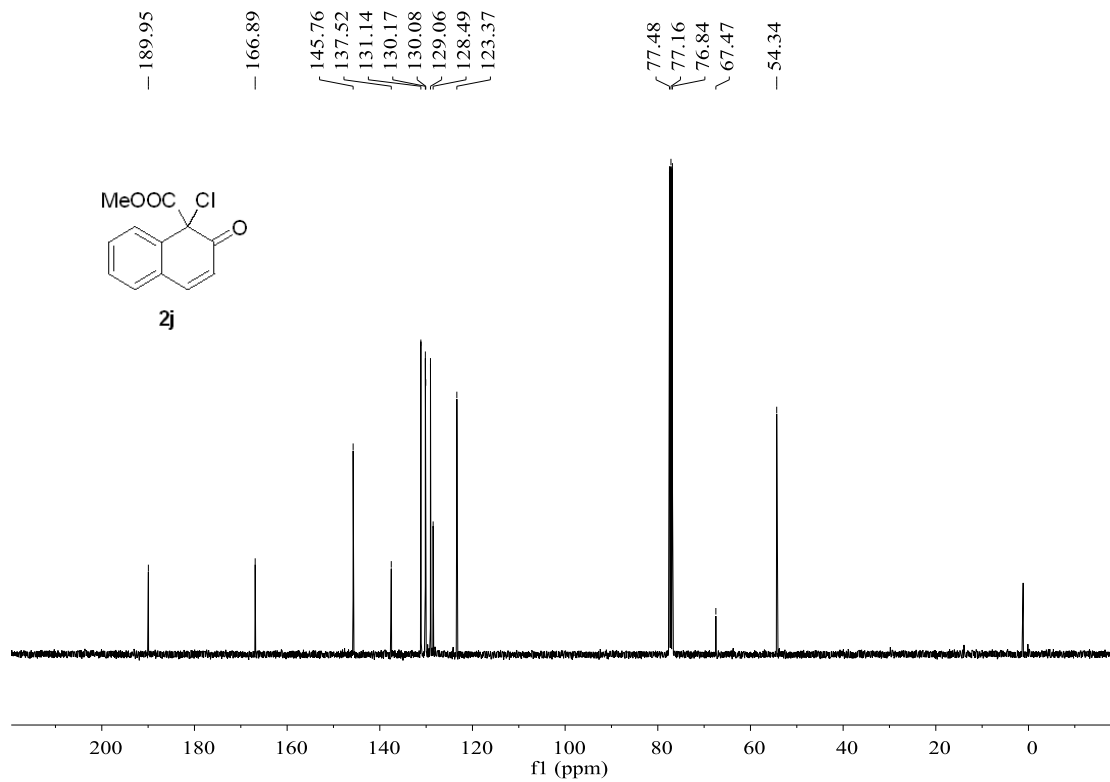

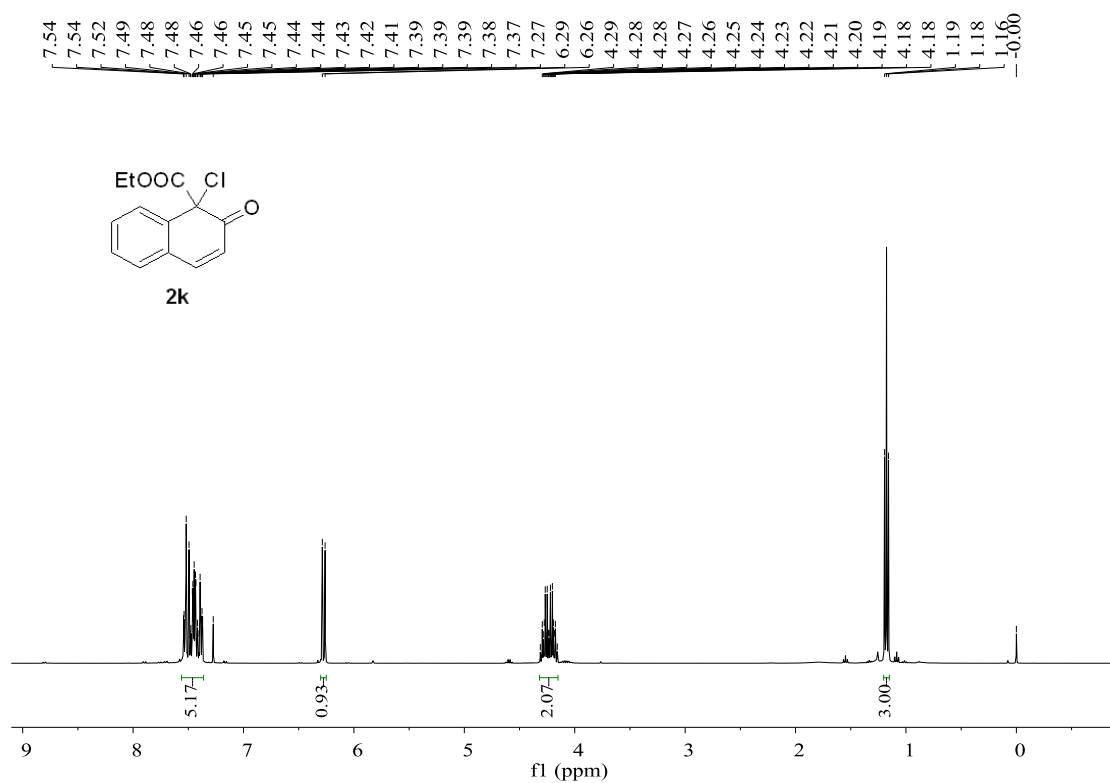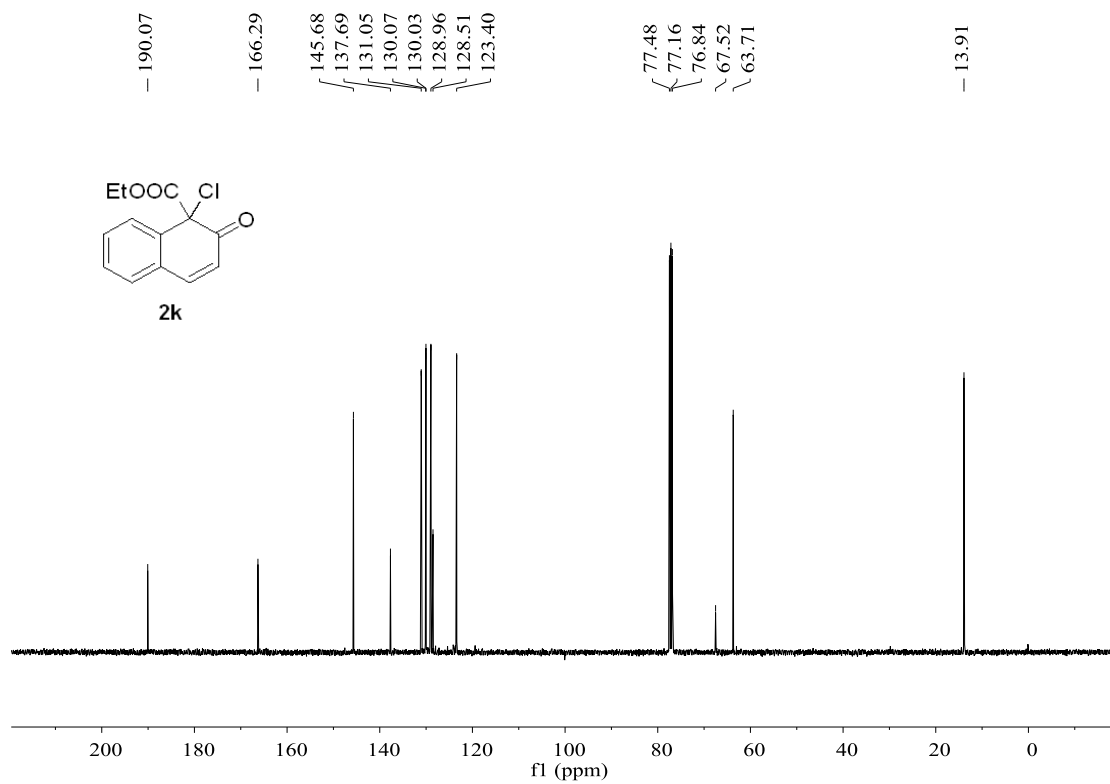

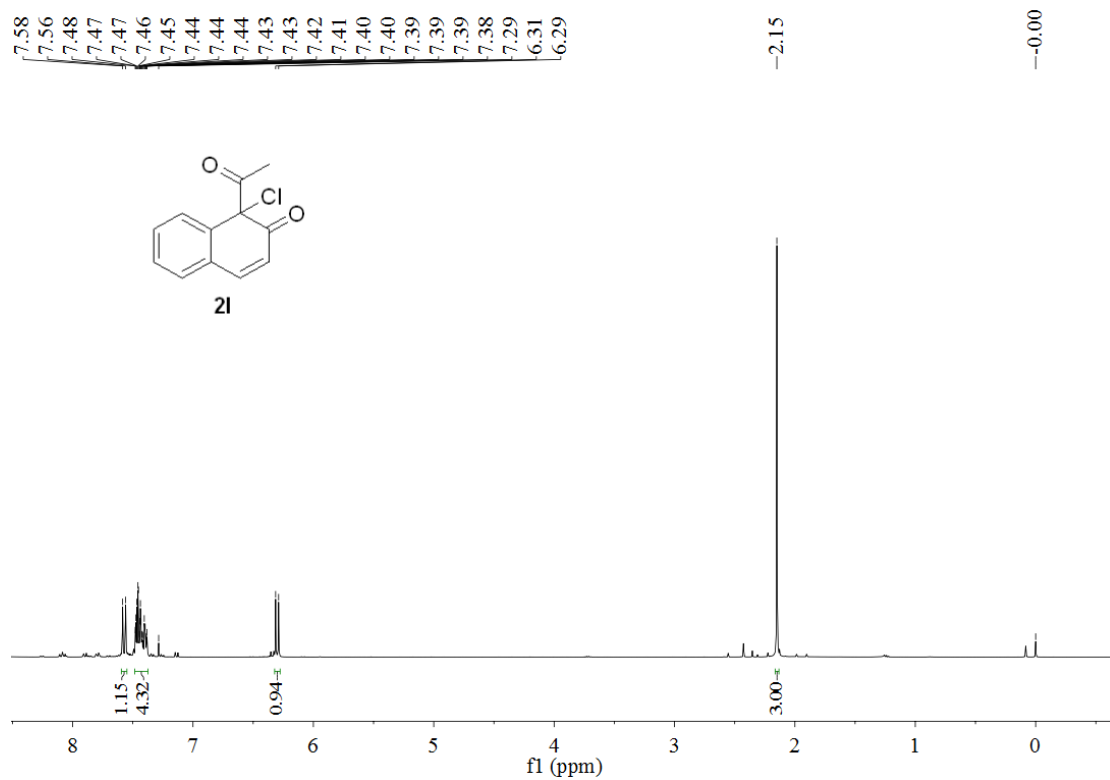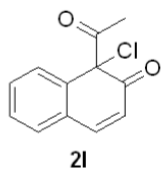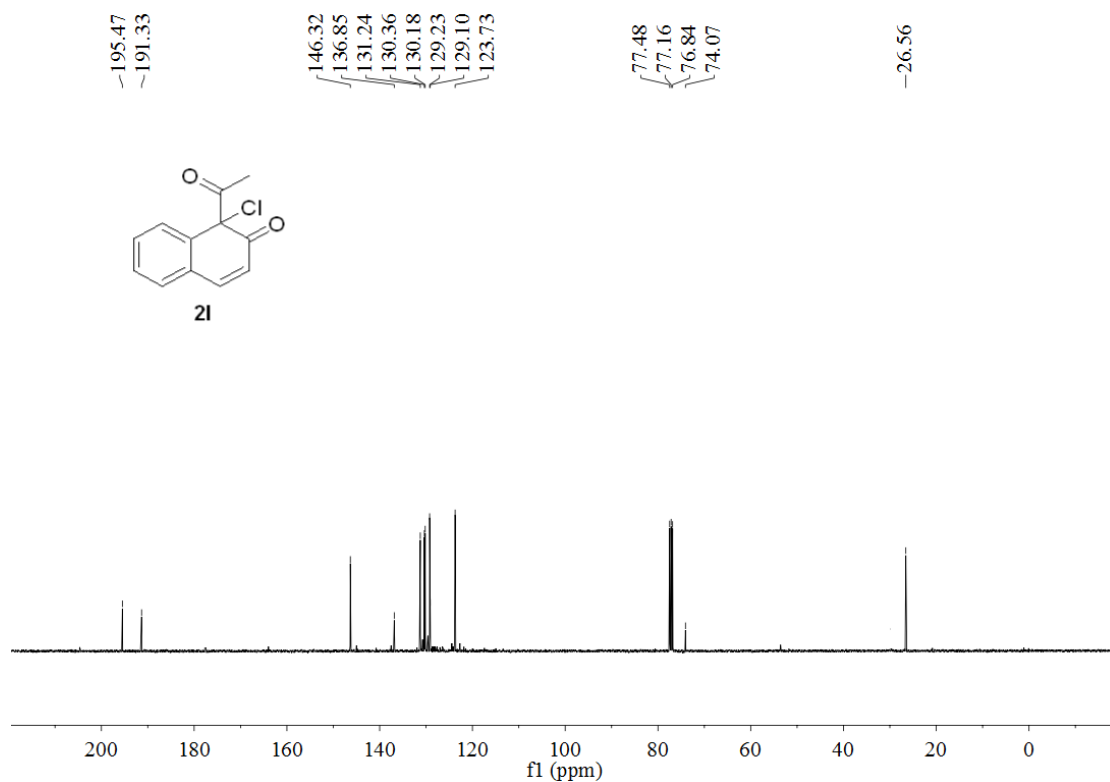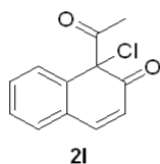

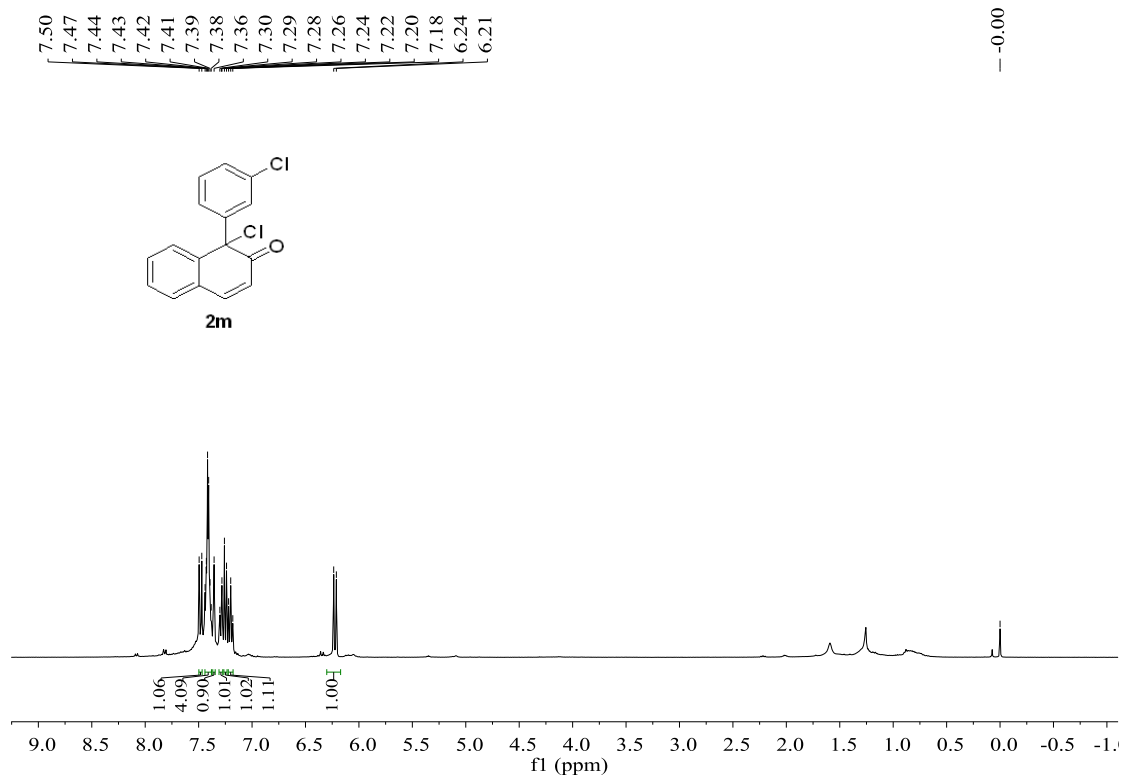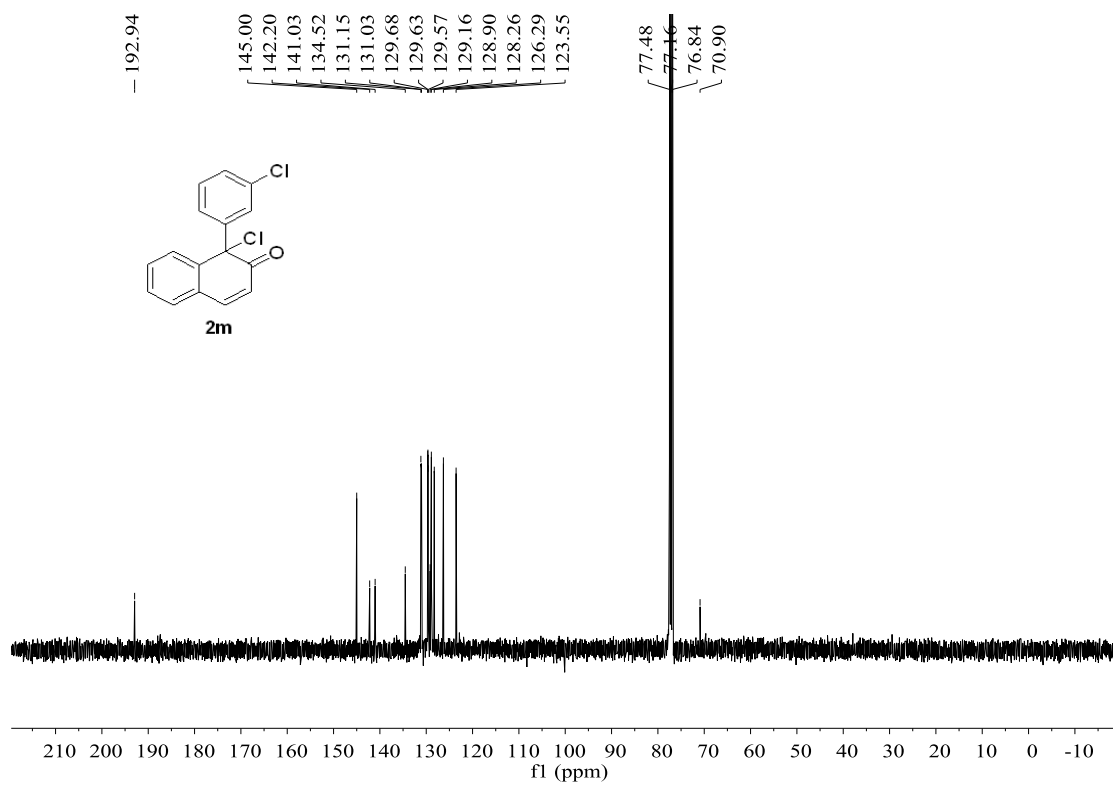

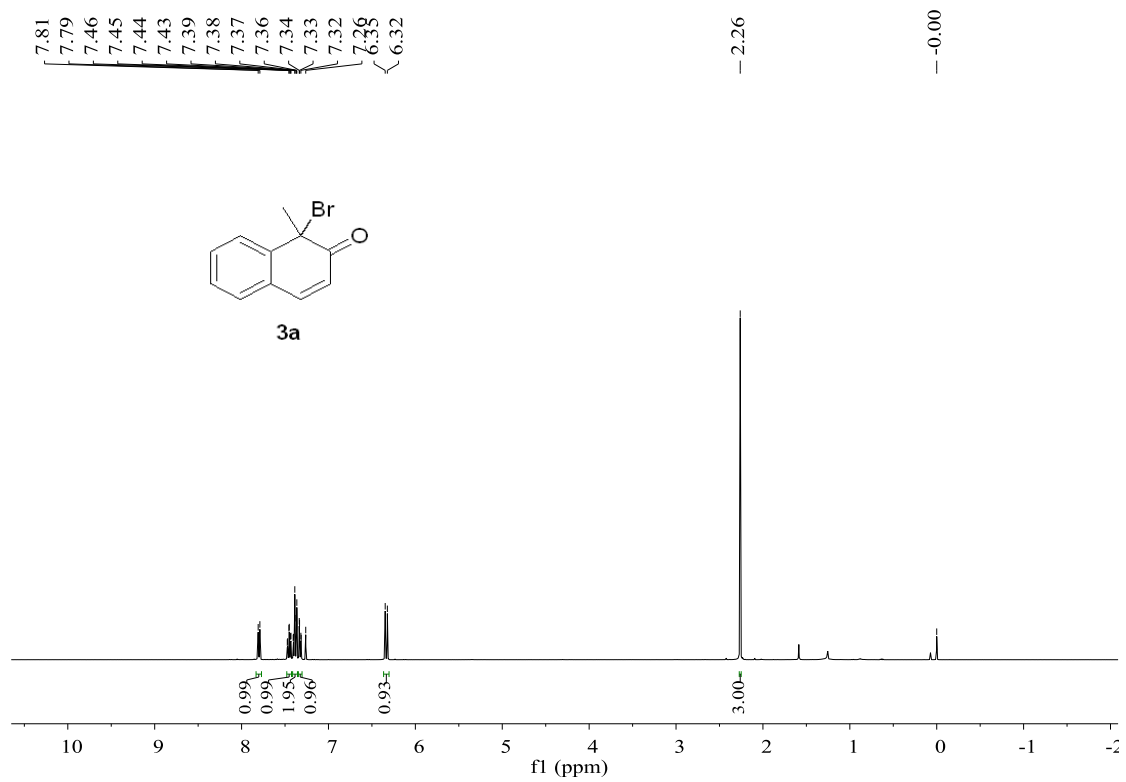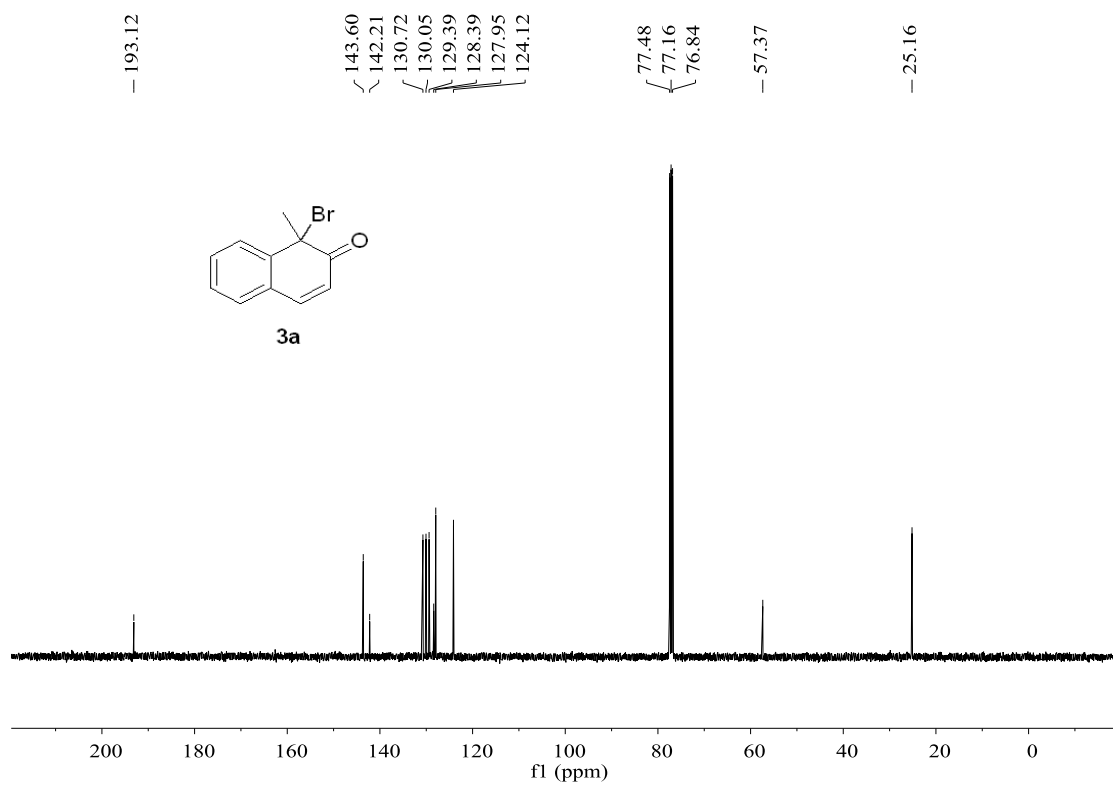

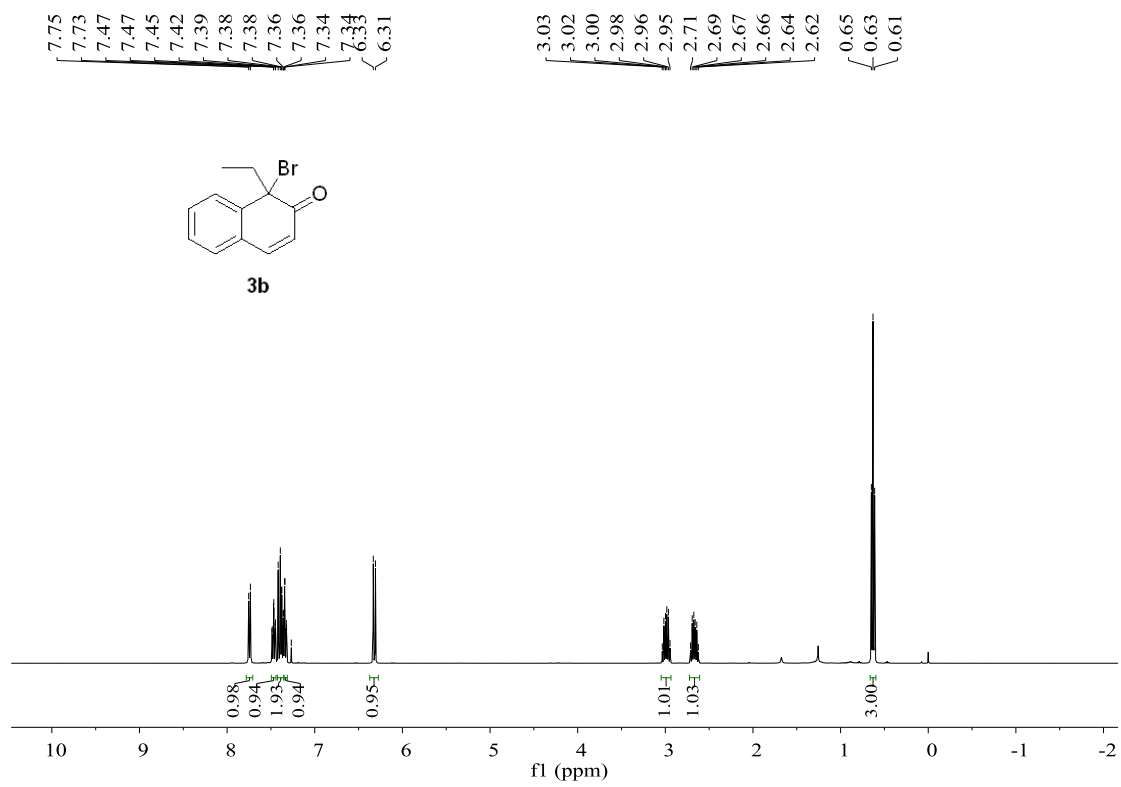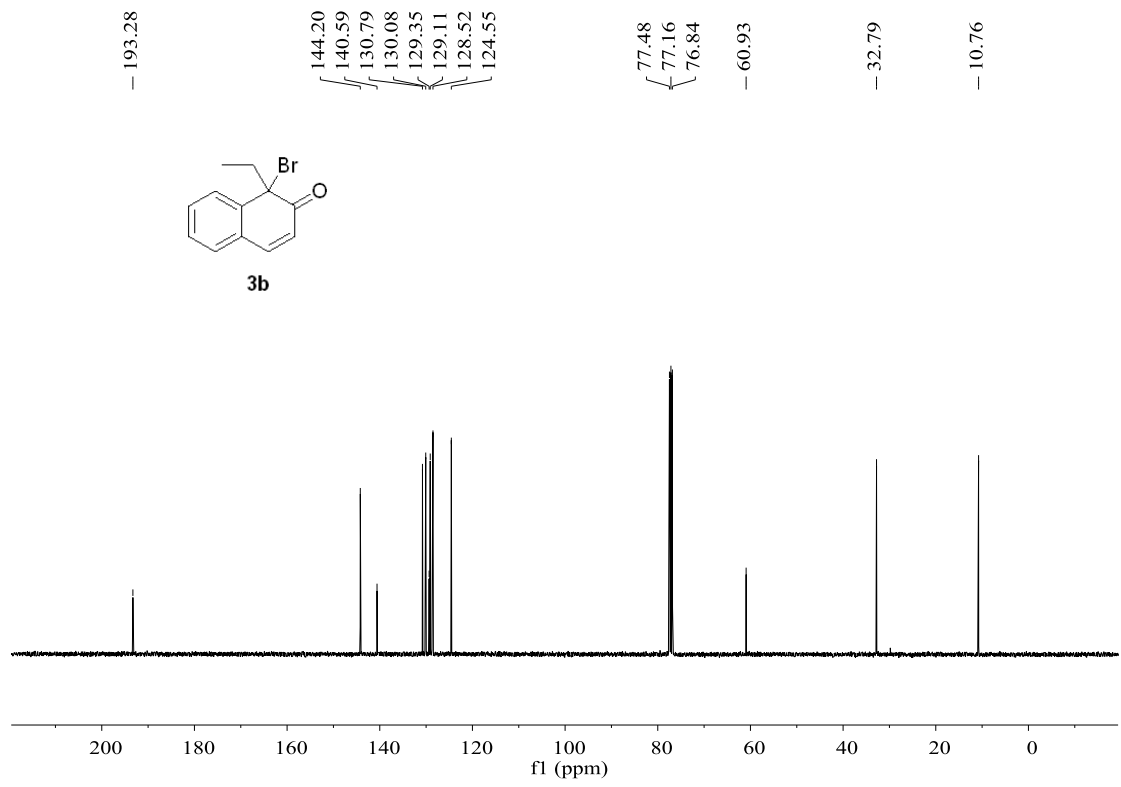



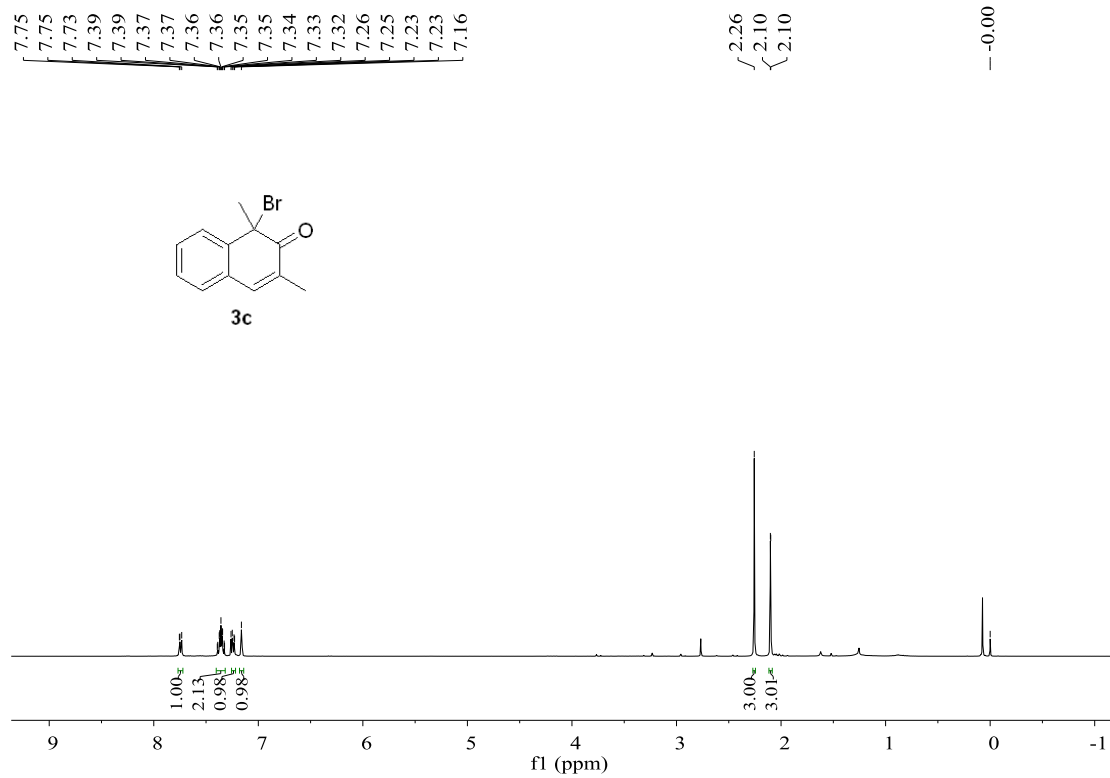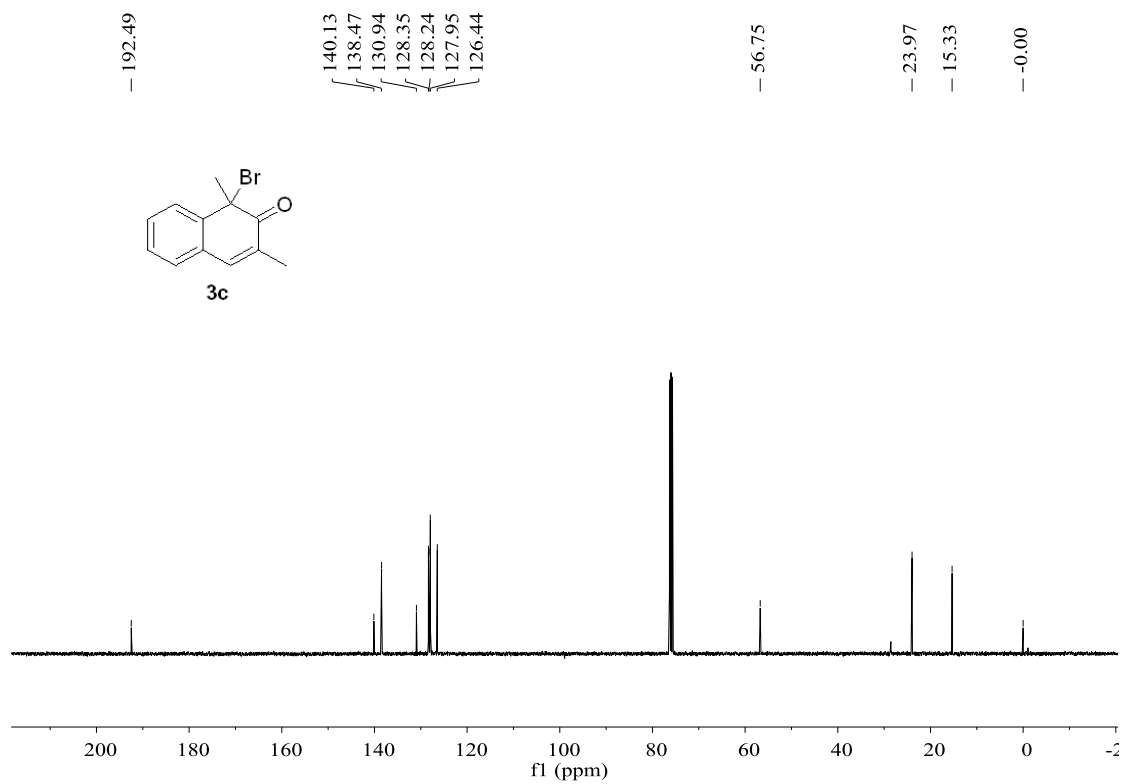

7.94  
7.92  
7.50  
7.50  
7.48  
7.48  
7.46  
7.46  
7.34  
7.33  
7.32  
7.31  
7.30  
7.29  
7.25  
7.21  
7.18  
7.17  
7.17  
7.15  
7.15  
7.05  
7.04  
7.03  
7.03  
7.03  
7.01  
7.00  
6.99  
6.99  
6.77  
6.76  
6.75  
6.74  
6.17  
6.14  
4.27  
4.23  
3.90  
3.87  
-0.00

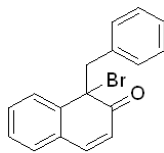

3d

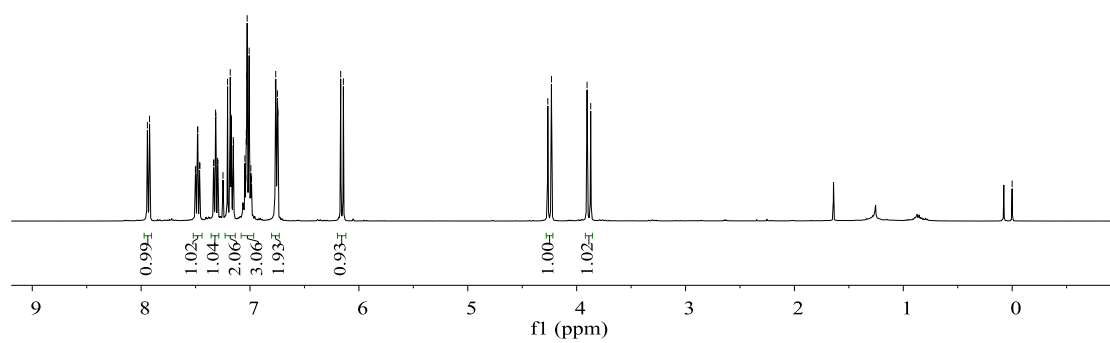

193.77  
144.81  
141.18  
135.07  
130.47  
130.20  
130.13  
129.75  
129.05  
128.18  
126.97  
124.35  
77.48  
77.16  
76.84  
60.54  
47.02

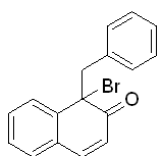

3d

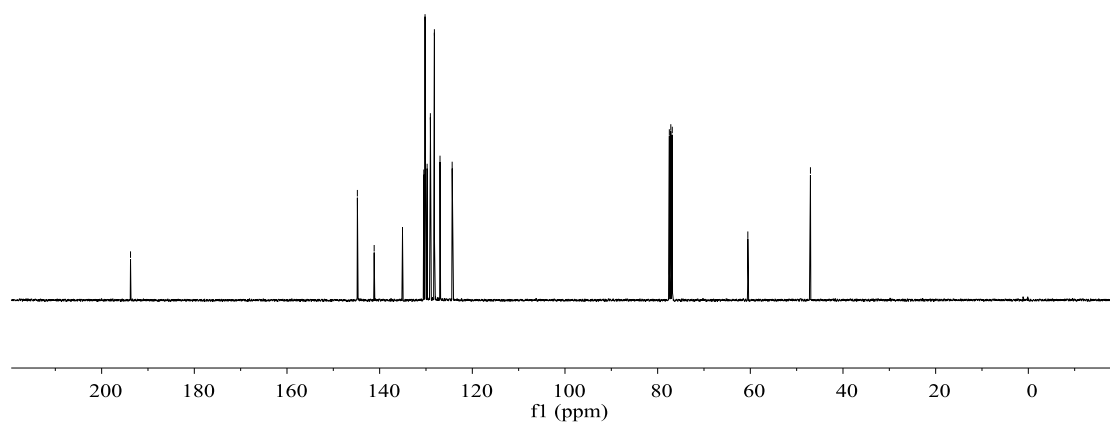

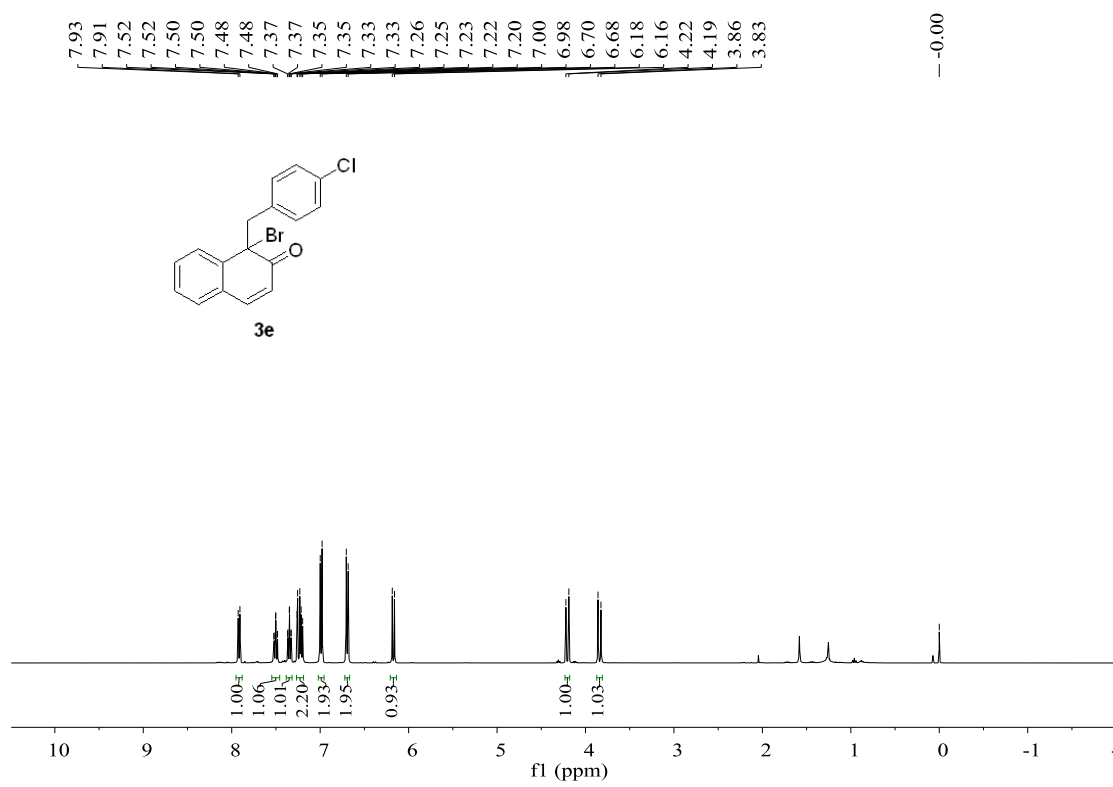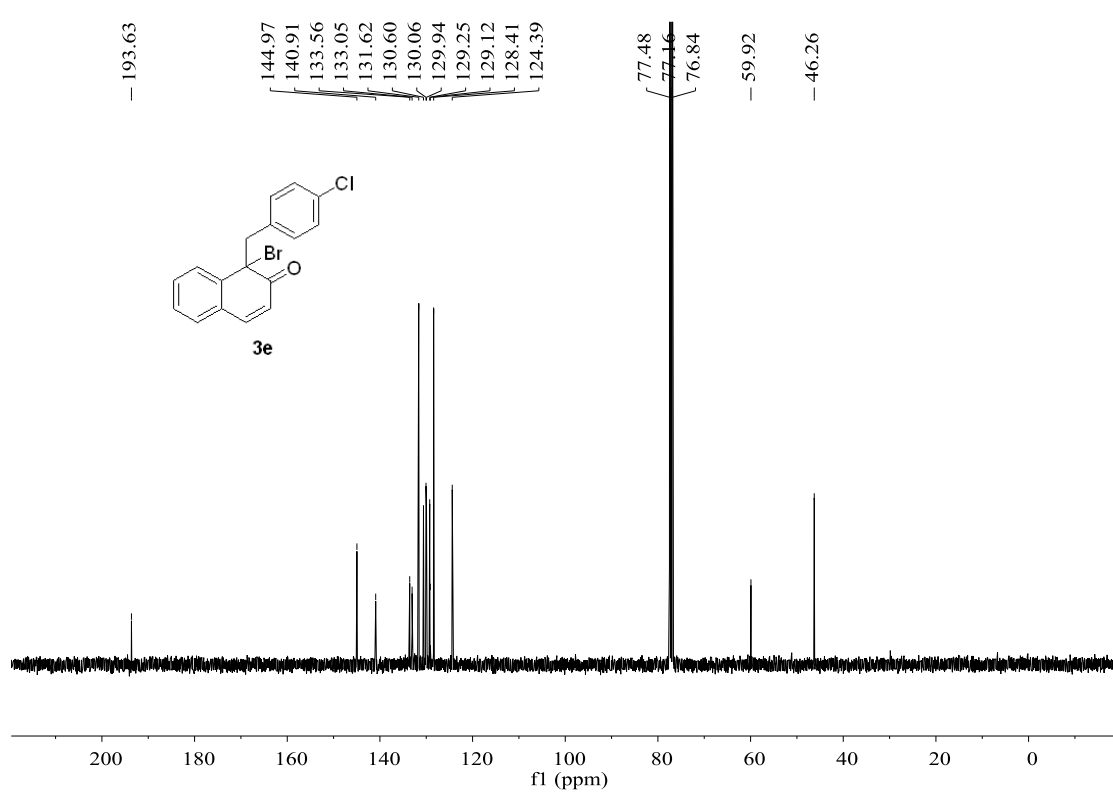

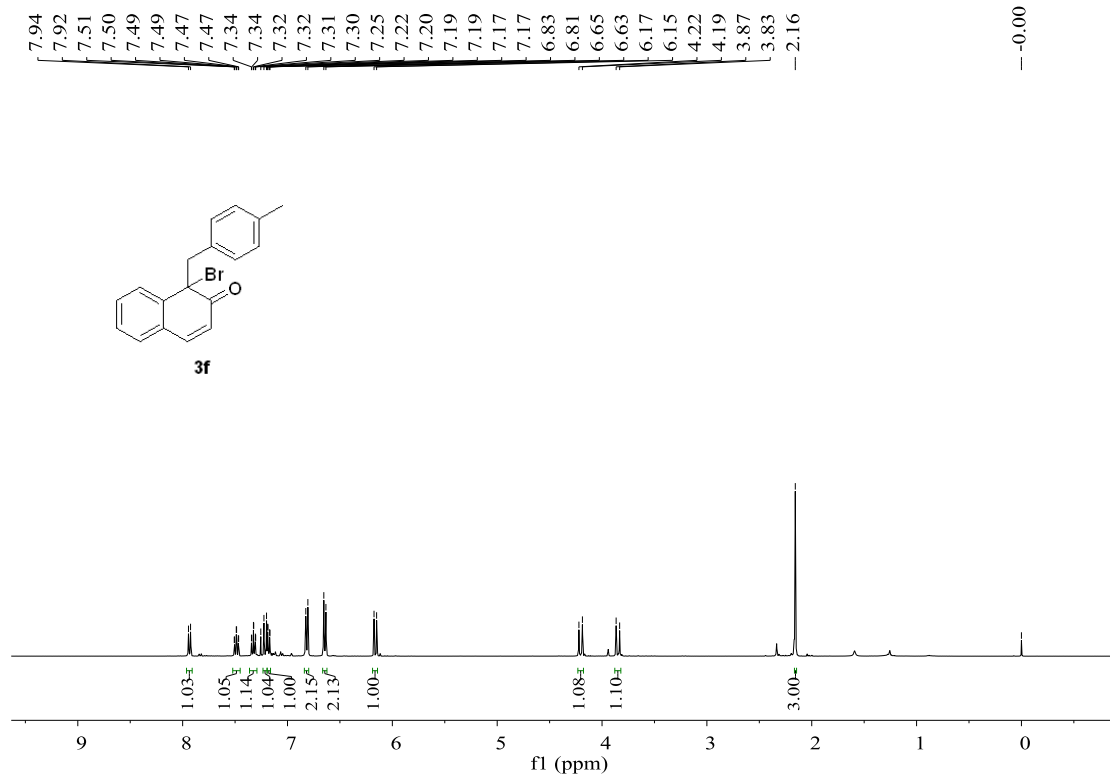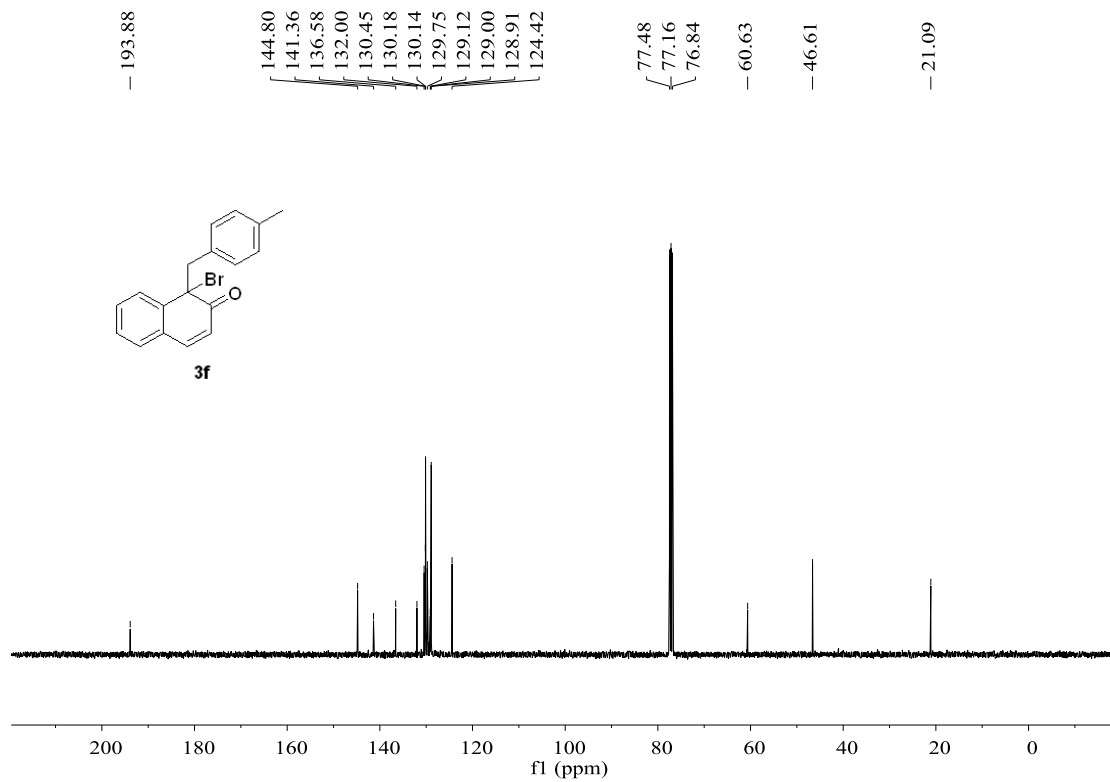

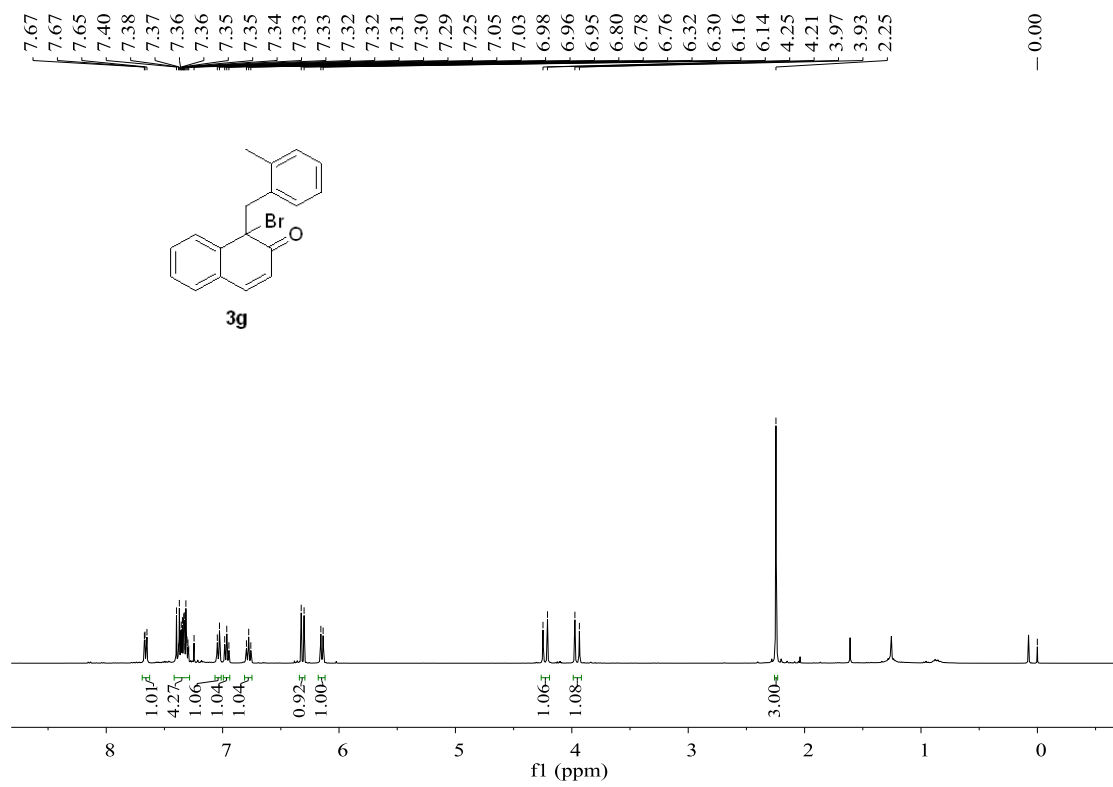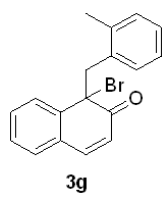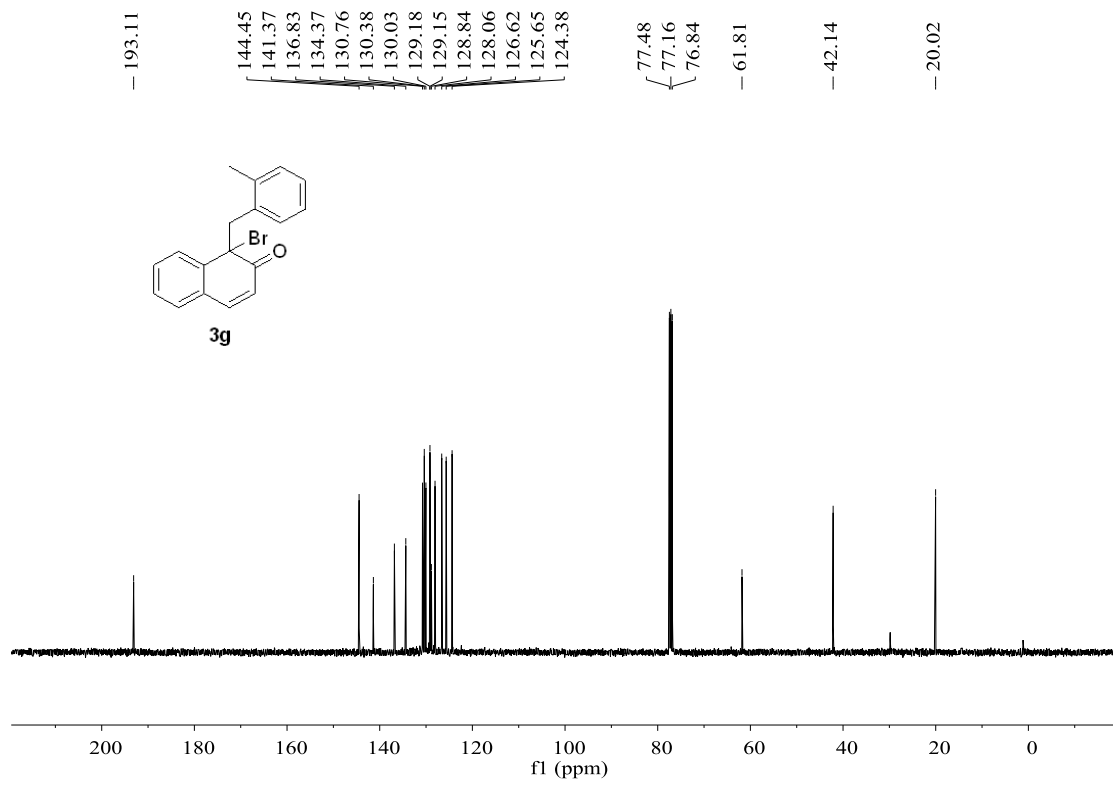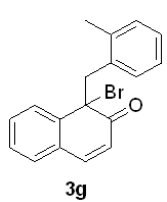

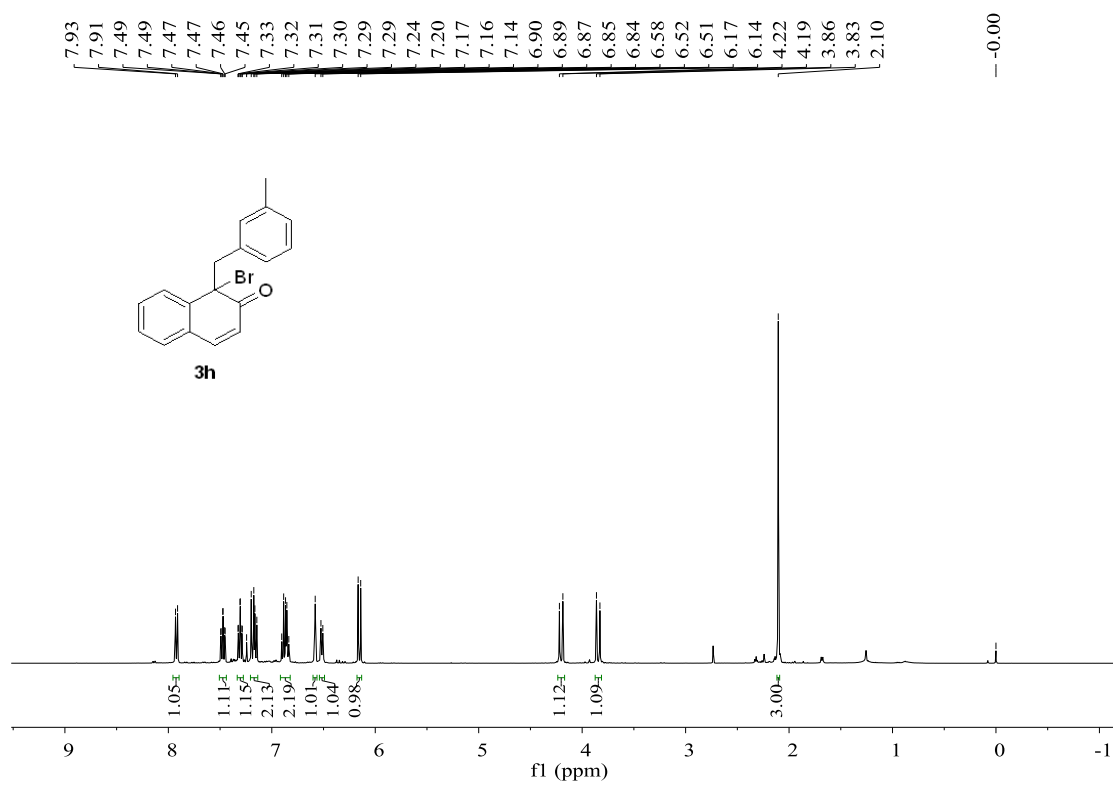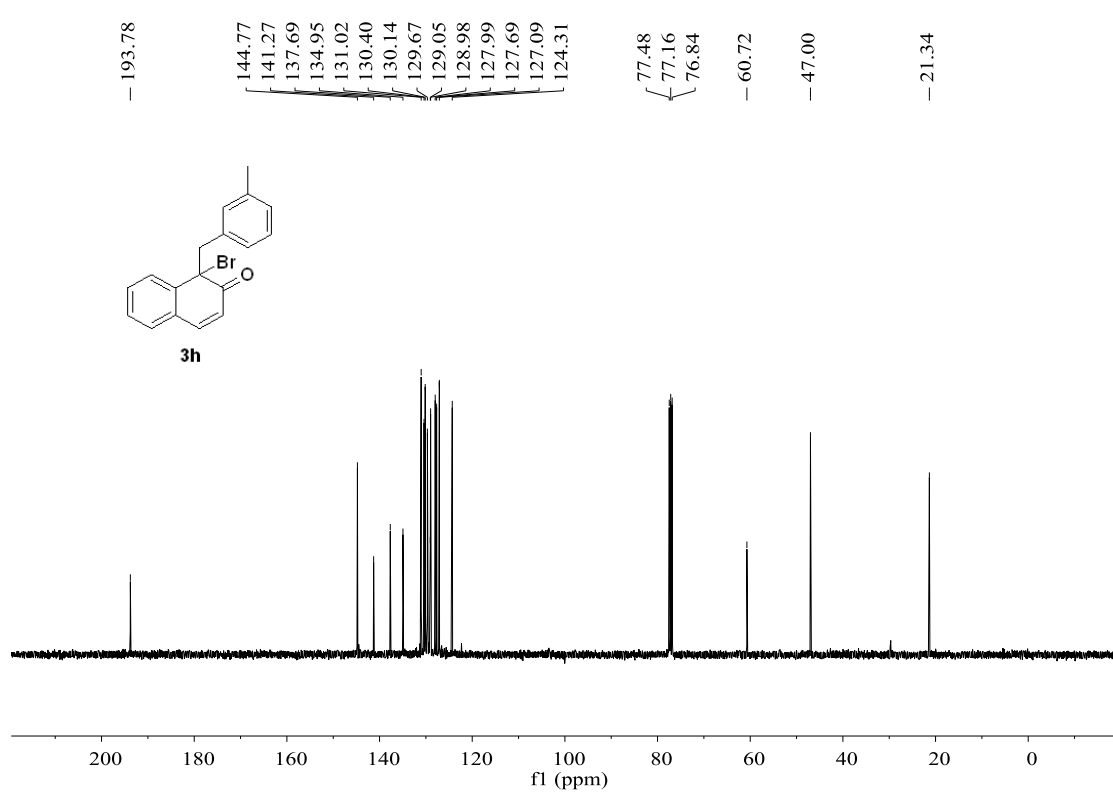

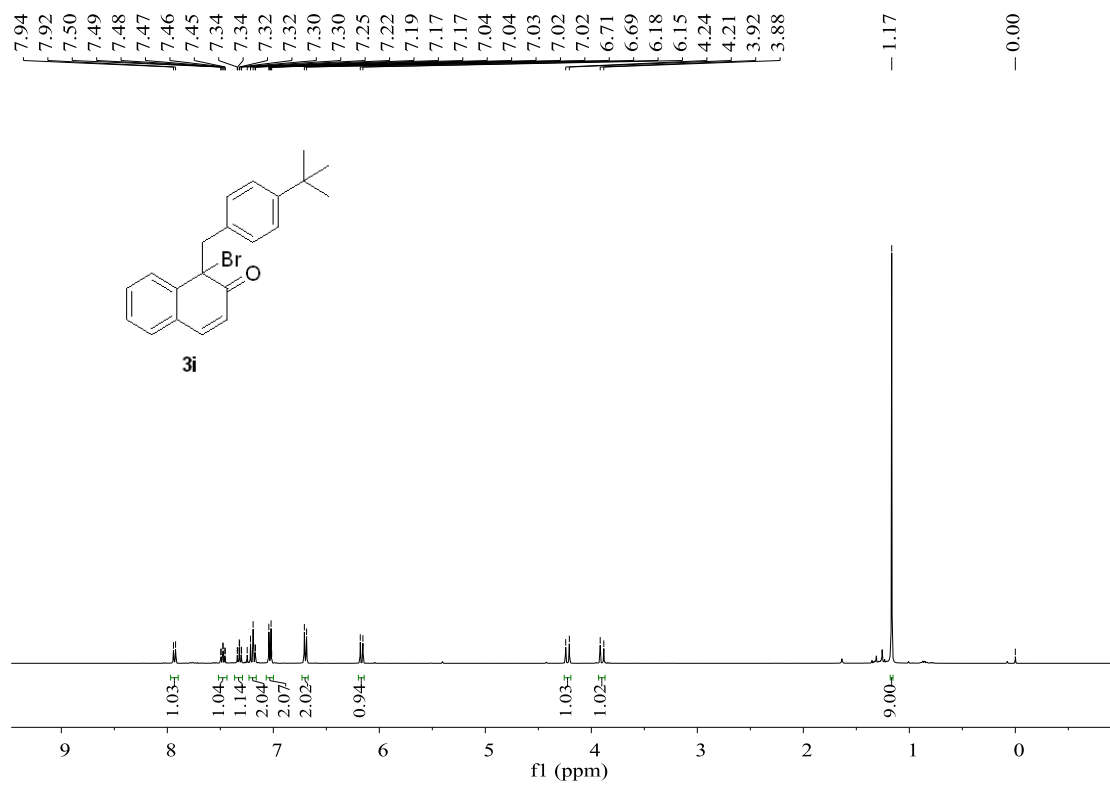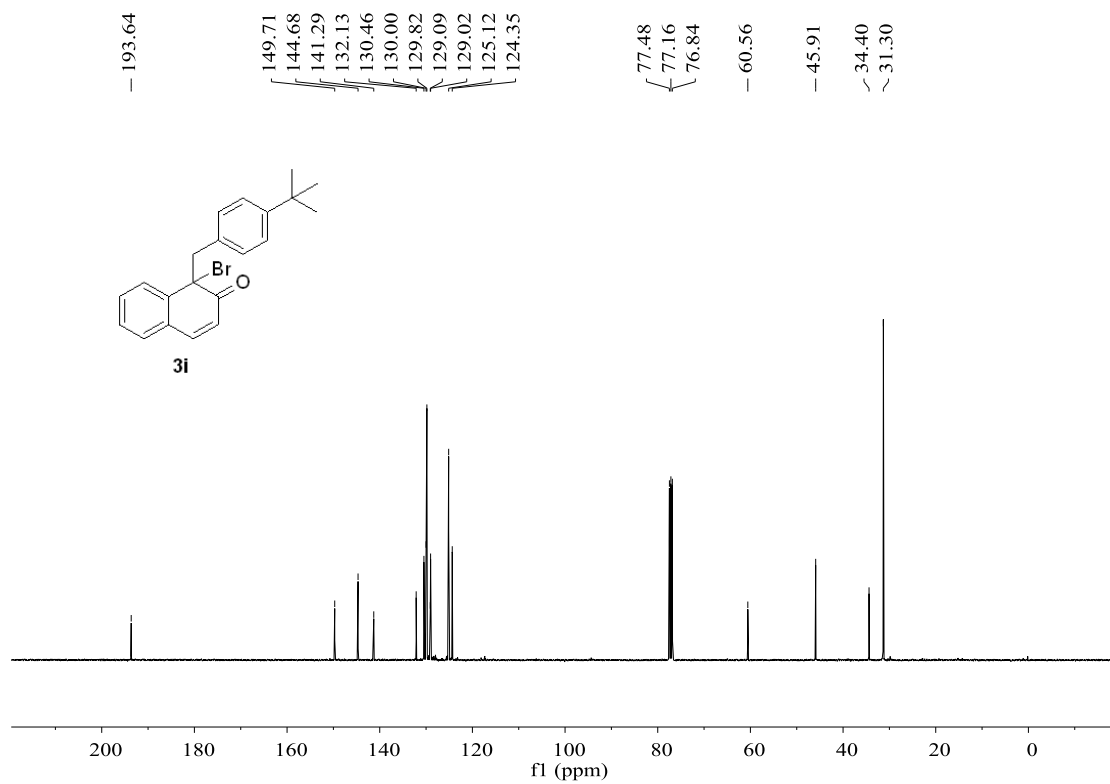

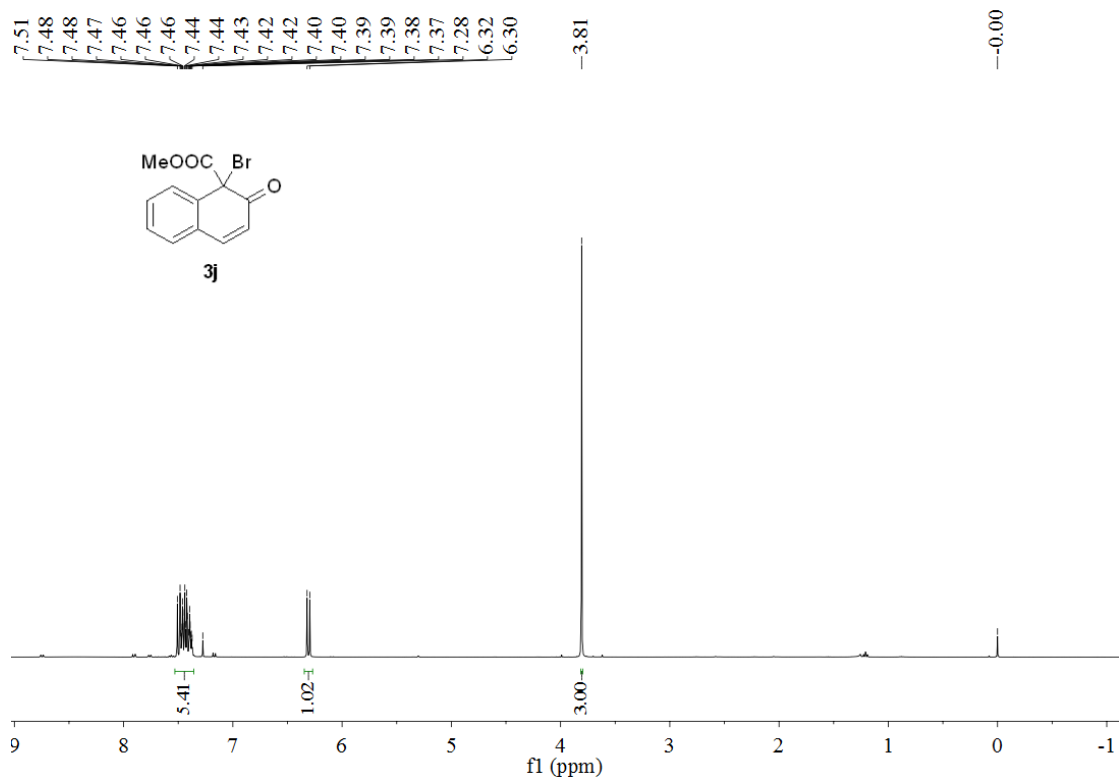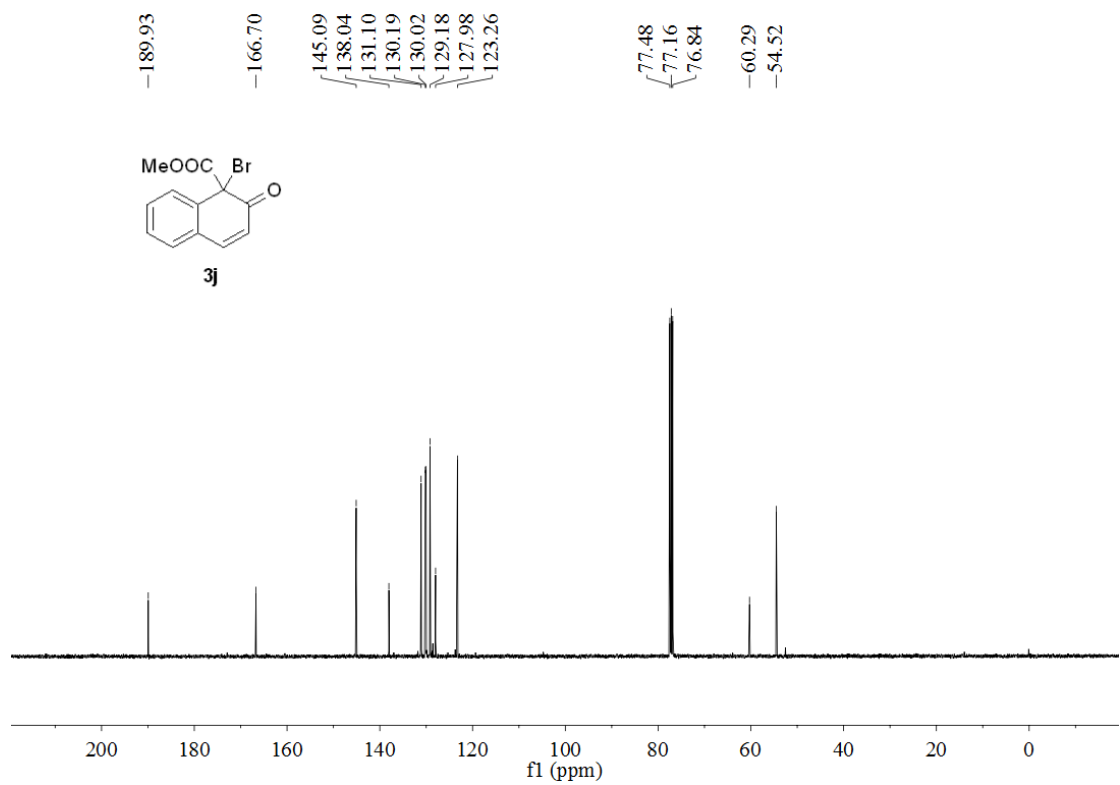



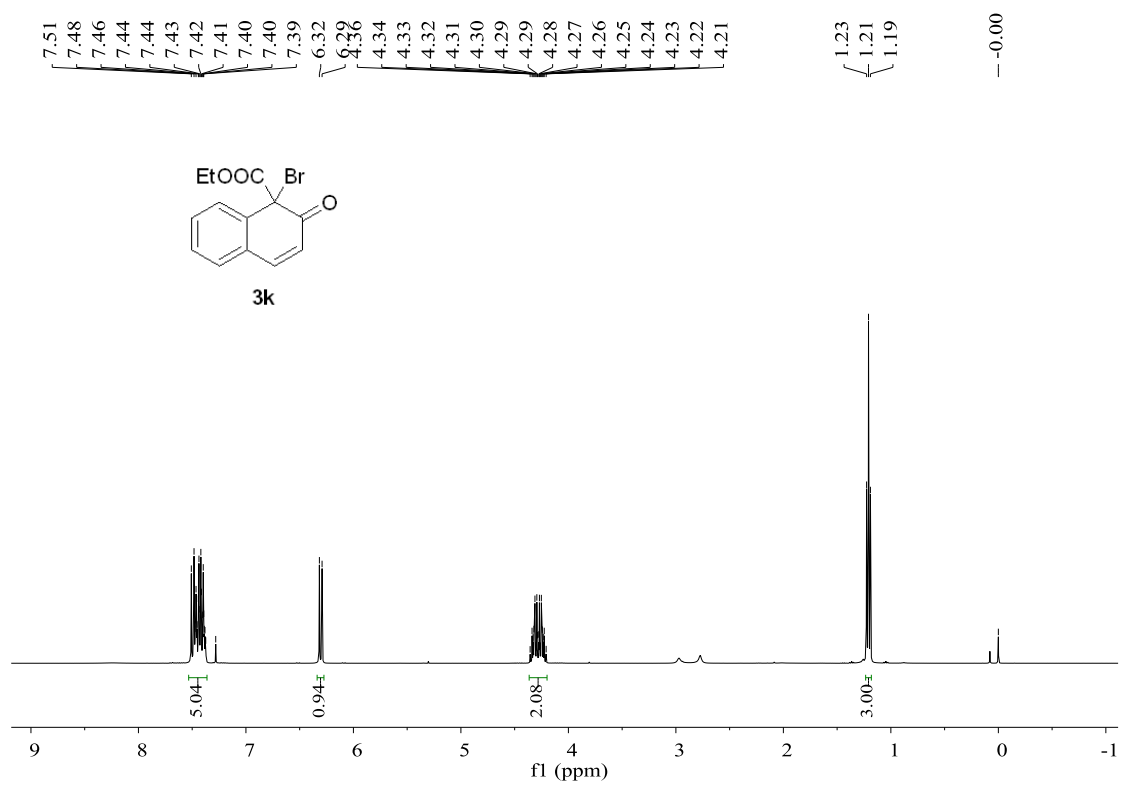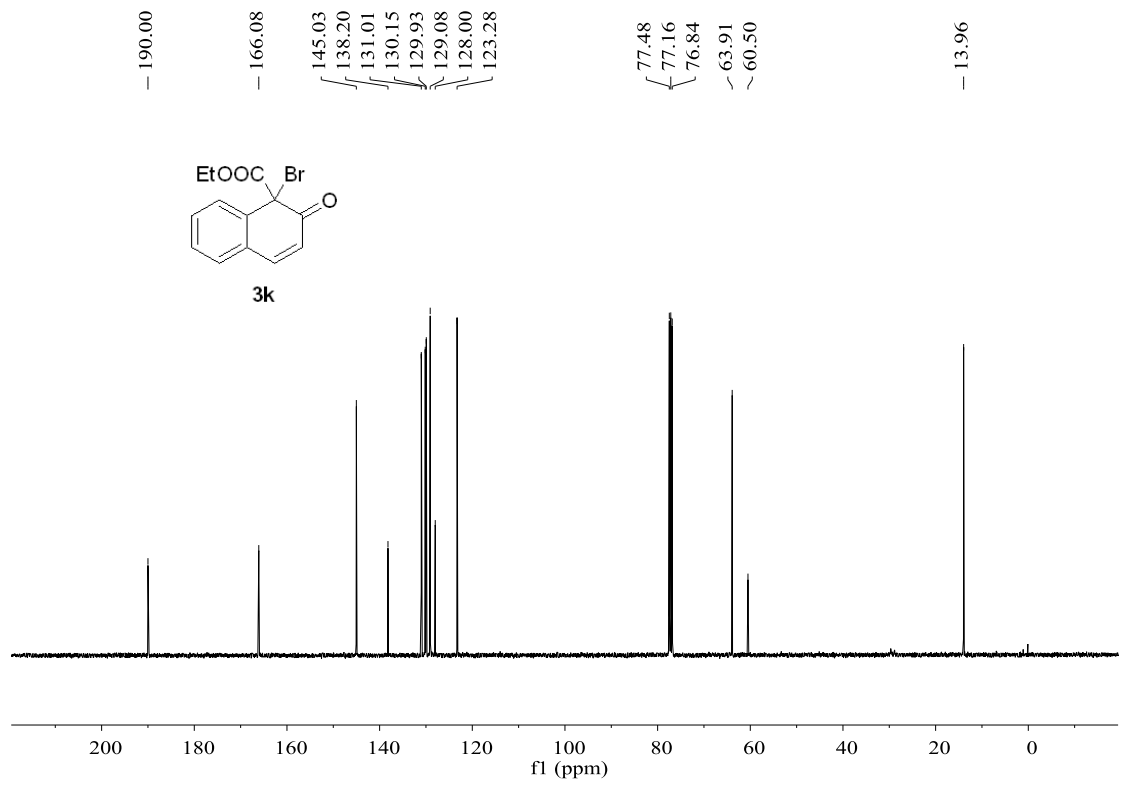

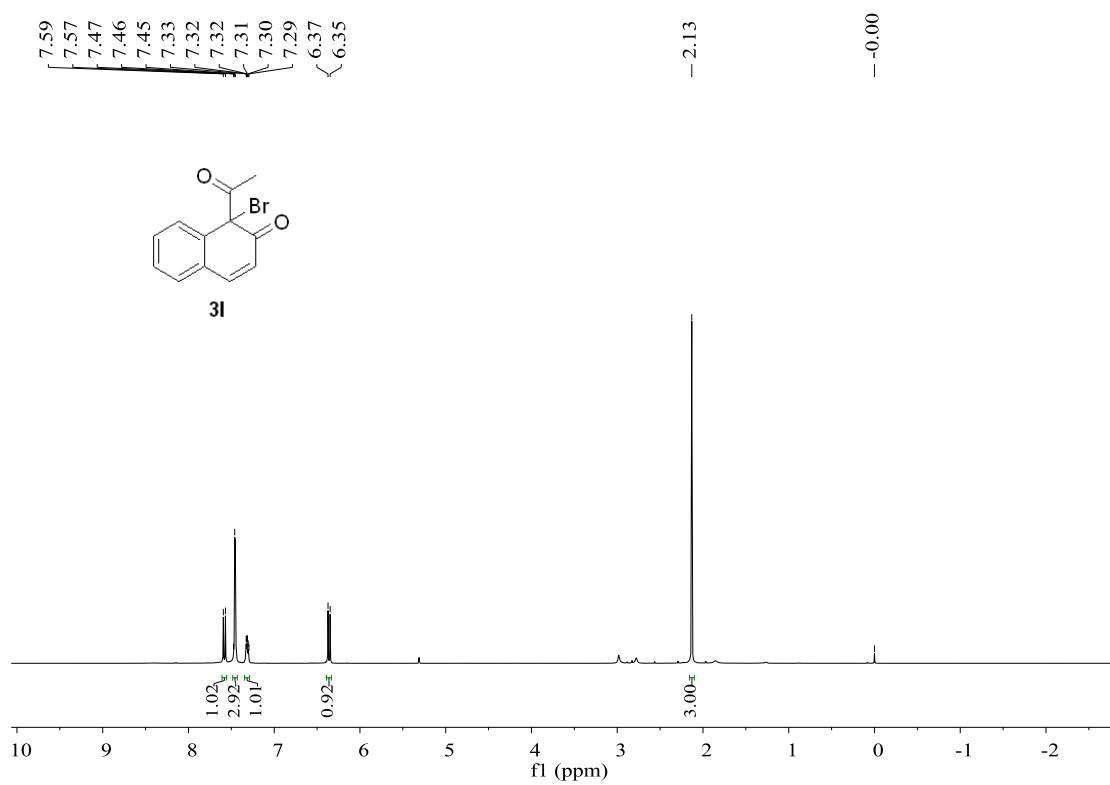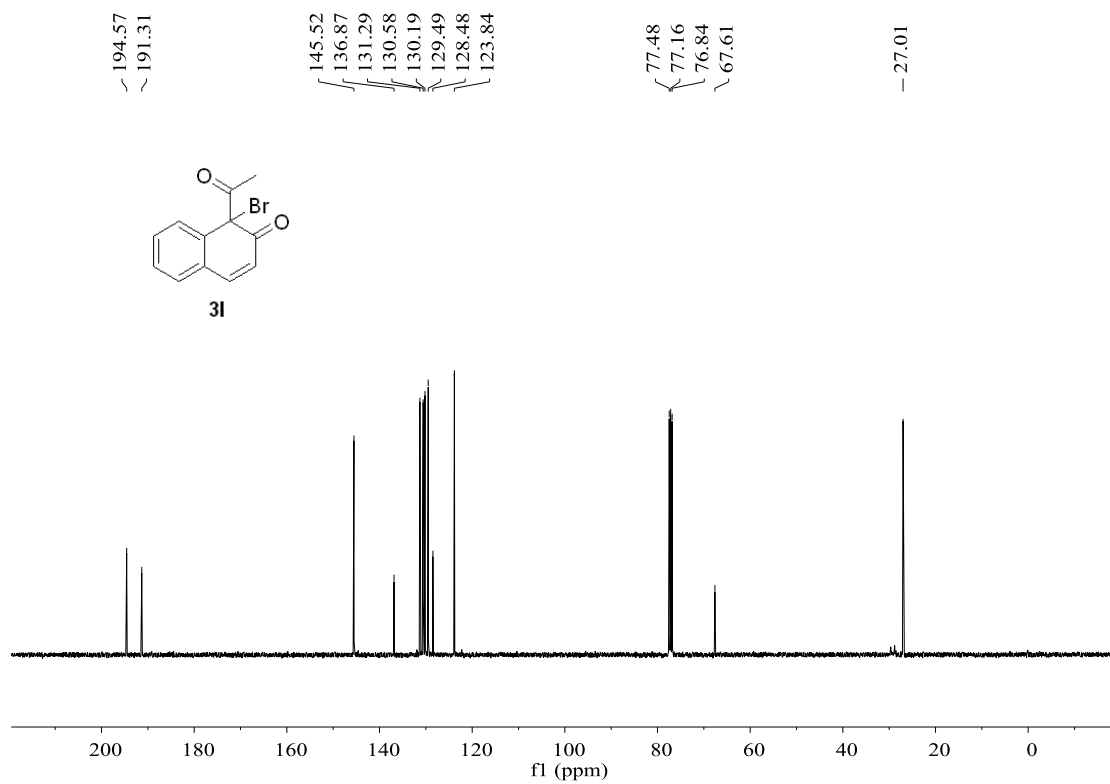

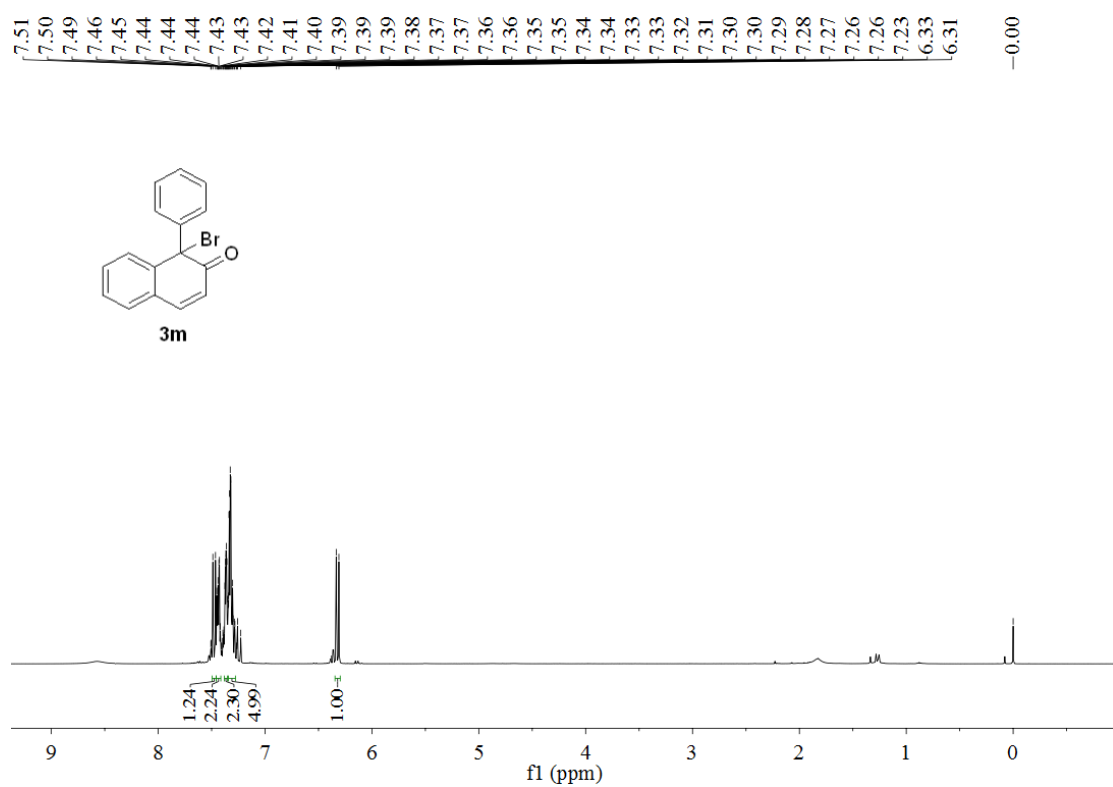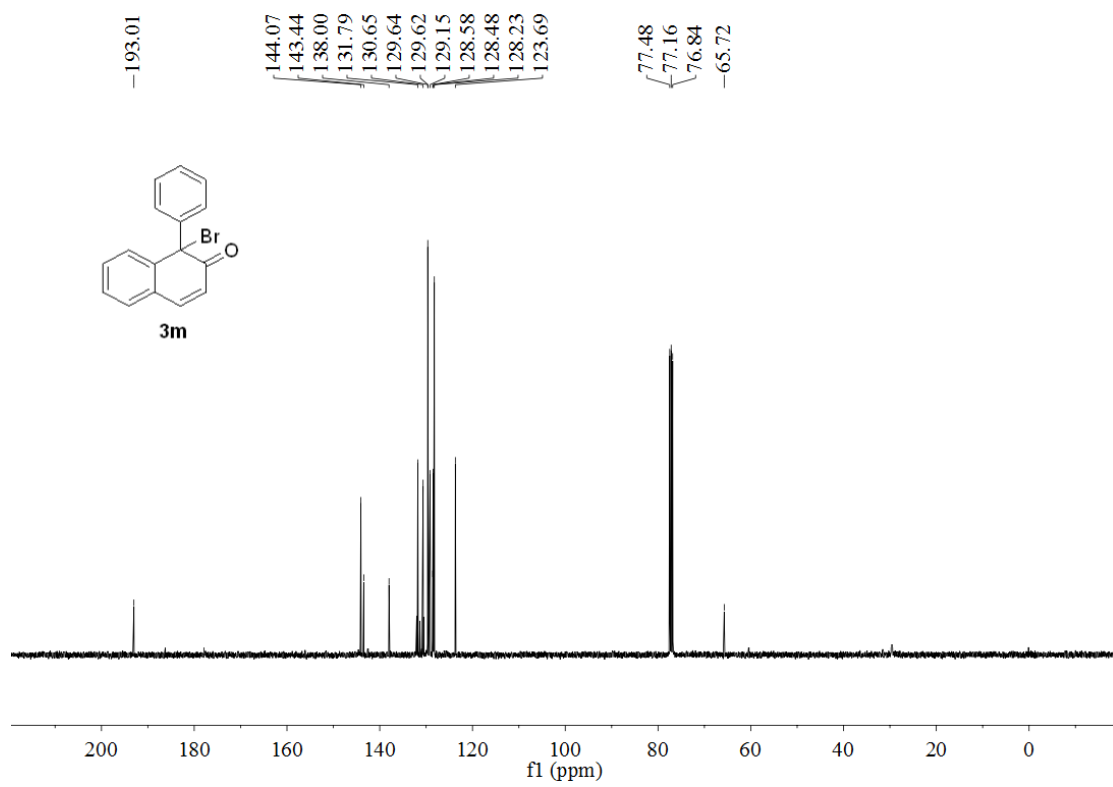

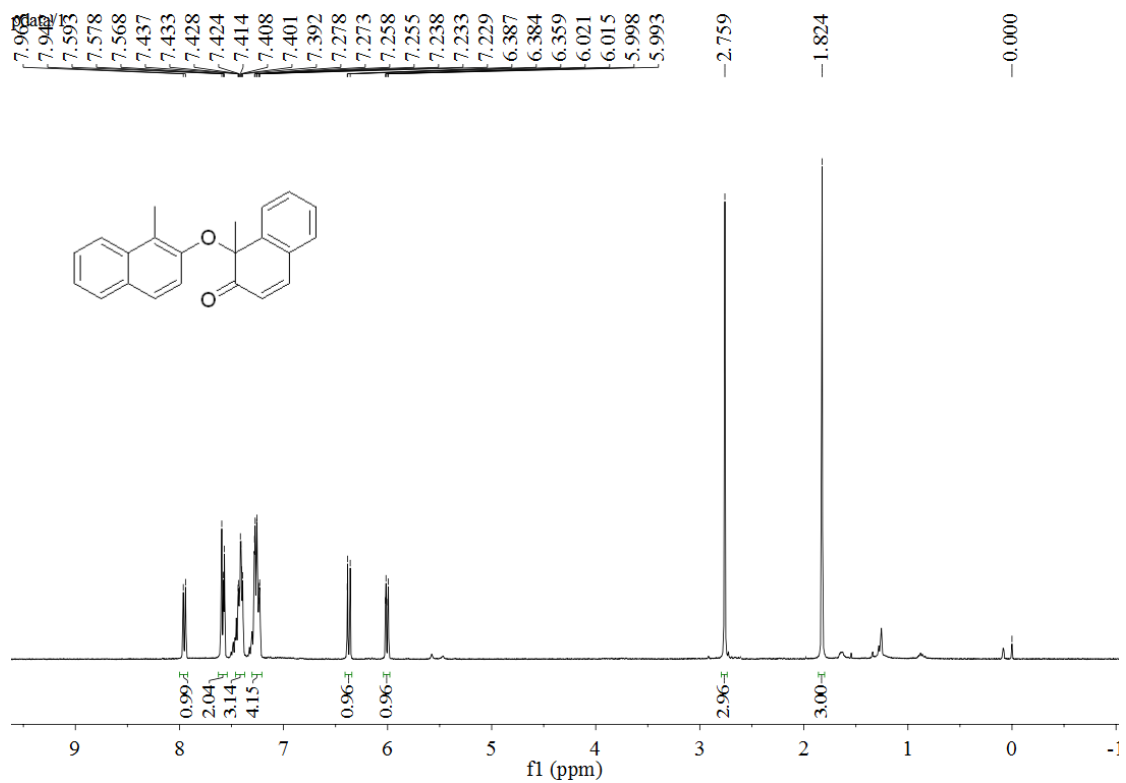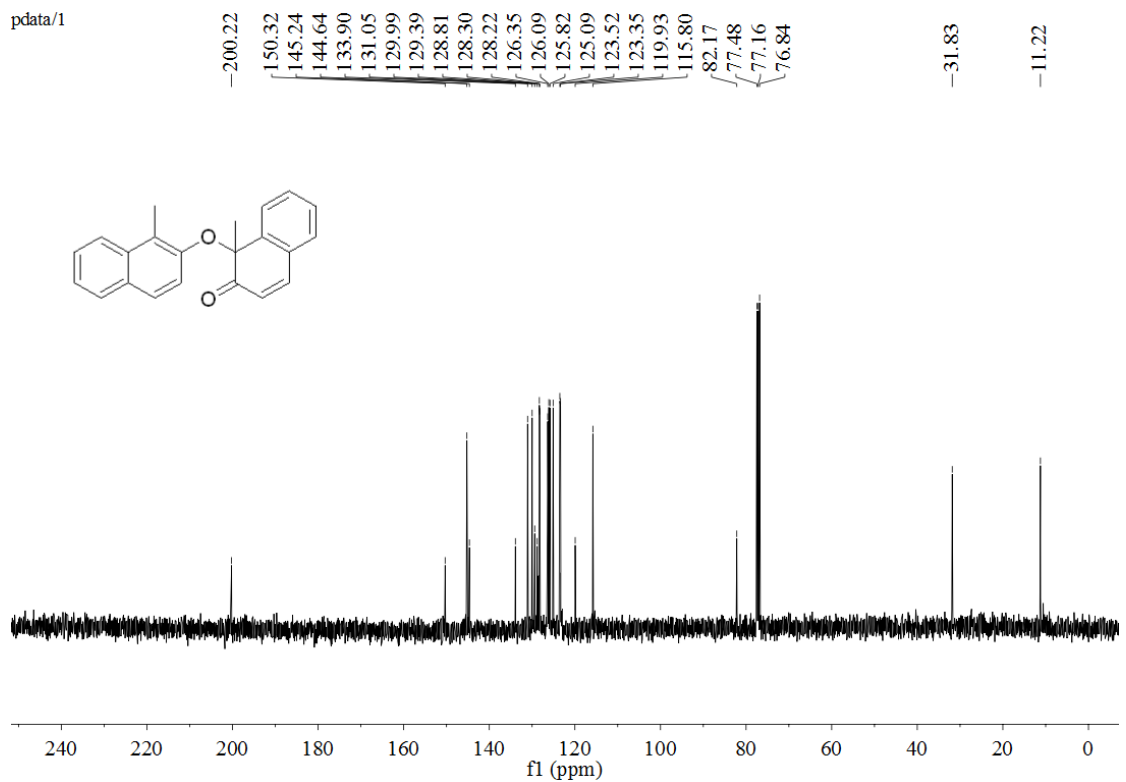

Supplement: c6gc01673a1.pdf [file c6gc01673a1.pdf]
